# Supplementary material for: Asymmetric synthesis of drug-like spiro[chroman-3,3′-indolin]-2′-ones through aminal-catalysis
Source: Royal Society of Chemistry journal article supplement (doi:10.1039/c3ob42100g), 2013-11-12

## Supporting Information-I

### Asymmetric Synthesis of Drug-like Spiro[chroman-3,3'-indolin]-2'-ones through Aminoal-catalysis

D. B. Ramachary,\* M. Shiva Prasad, S. Vijaya Laxmi and R. Madhavachary

*Catalysis Laboratory, School of Chemistry, University of Hyderabad, Central University (P.O.),  
Hyderabad 500 046, India*

[ramsc@uohyd.ernet.in](mailto:ramsc@uohyd.ernet.in) and [ramchary.db@gmail.com](mailto:ramchary.db@gmail.com)

**General Methods:** The  $^1\text{H}$  NMR and  $^{13}\text{C}$  NMR spectra were recorded at 400 MHz and 100 MHz, respectively. The chemical shifts are reported in ppm downfield to TMS ( $\delta = 0$ ) for  $^1\text{H}$  NMR and relative to the central  $\text{CDCl}_3$  resonance ( $\delta = 77.0$ ) for  $^{13}\text{C}$  NMR. *In the  $^{13}\text{C}$  NMR spectra, the nature of the carbons (C, CH,  $\text{CH}_2$  or  $\text{CH}_3$ ) was determined by recording the DEPT-135 experiment, and is given in parentheses.* The coupling constants  $J$  are given in Hz. Column chromatography was performed using Acme's silica gel (particle size 0.063-0.200 mm). High resolution mass spectra were recorded on micromass ESI-TOF MS. GCMS mass spectrometry was performed on Shimadzu GCMS-QP2010 mass spectrometer. IR spectra were recorded on JASCO FT/IR-5300. Elemental analyses were recorded on a Thermo Finnigan Flash EA 1112 analyzer. Mass spectra were recorded on either VG7070H mass spectrometer using EI technique or Shimadzu-LCMS-2010 A mass spectrometer. The X-ray diffraction measurements were carried out at 298 K on an automated Enraf-Nonious MACH 3 diffractometer using graphite monochromated, Mo-K $\alpha$  ( $\lambda = 0.71073 \text{ \AA}$ ) radiation with CAD4 software or the X-ray intensity data were measured at 298 K on a Bruker SMART APEX CCD area detector system equipped with a graphite monochromator and a Mo-K $\alpha$  fine-focus sealed tube ( $\lambda = 0.71073 \text{ \AA}$ ). For thin-layer chromatography (TLC), silica gel plates Merck 60 F254 were used and compounds were visualized by irradiation with UV light and/or by treatment with a solution of *p*-anisaldehyde (23 mL), conc.  $\text{H}_2\text{SO}_4$  (35 mL), acetic acid (10 mL), and ethanol (900 mL) followed by heating.

The enantiomeric excess (*ee*) of the *r*-M products was determined by chiral stationary phase HPLC using a Daicel Chiralcel OD-H, Chiralcel OJ-H, Chiralpak AD-H, Chiralpak AS-H and Lux 5u Amylose-2, Lux 5u Cellulose-1, Lux 5u Cellulose-2 columns and hexane/2-propanol as the eluent. Retention times and solvent ratios are indicated in the respective entries.

**Materials:** All solvents and commercially available chemicals were used as received. The substrates of 3-substituted oxindoles **2** were prepared from the corresponding isatins and oxindoles according to the procedures previously reported.<sup>1</sup> The substrates of *O*-hydroxy cinnamaldehydes **1** were prepared according to previous literature reports.<sup>2</sup>

### **General Experimental Procedures:**

**Procedure A:** In an ordinary glass vial equipped with a magnetic stirring bar, a mixture of *R*-(+)-DPPOTMS **3** (19.6 mg, 0.06 mmol) and acetic acid **4b** (0.0034 mL, 0.06 mmol) in CHCl<sub>3</sub> (0.6 mL), was added 2-hydroxycinnamaldehyde **1a** (53 mg, 0.36 mmol) and allowed to stir for 10 min followed by addition of **2** (96 mg, 0.3 mmol). After stirring the reaction mixture for 12 h the reaction mixture was loaded on to silica gel column directly eluting with hexane/EtOAc (10:1 to 10:2).

**Procedure B:** In an ordinary glass vial equipped with a magnetic stirring bar, a mixture of *R*-(+)-DPPOTMS **3** (19.6 mg, 0.06 mmol) and acetic acid **4b** (0.0034 mL, 0.06 mmol) in CHCl<sub>3</sub> (0.6 mL), was added 2-hydroxycinnamaldehyde **1a** (53 mg, 0.36 mmol) and allowed to stir for 10 min followed by addition of **2** (96 mg, 0.3 mmol). After stirring the reaction mixture at 25 °C for 12 h, was added 1.0 mL CHCl<sub>3</sub> and Ph<sub>3</sub>P=CHCO<sub>2</sub>Et **6** (209 mg, 0.6 mmol). After stirring the reaction mixture for 2 h the reaction mixture was loaded on to silica gel column directly eluting with hexane/EtOAc (10:1 to 10:2).

**Procedure C:** In an ordinary glass vial equipped with a magnetic stirring bar, a mixture of *R*-(+)-DPPOTMS **3** (19.6 mg, 0.06 mmol) and acetic acid **4b** (0.0034 mL, 0.06 mmol) in CHCl<sub>3</sub> (0.6 mL), was added 2-hydroxycinnamaldehyde **1a** (53 mg, 0.36 mmol) and allowed to stir for

10 min followed by addition of **2a** (96 mg, 0.3 mmol). After stirring the reaction mixture at 25 °C for 12 h, was added 1.0 mL of CHCl<sub>3</sub>, malononitrile (24 mg, 0.36 mmol) and Hantzsch ester **8** (84 mg, 0.36 mmol). After stirring the reaction mixture at 25 °C for 1 h, then reaction mixture was loaded on to silica gel column directly eluting with hexane/EtOAc (10:2 to 10:3).

**Procedure D:** In an oven dried round bottomed flask with *r*-M product **5aa** (150 mg, 0.3 mmol), was added methanol (1.0 mL), trimethyl orthoformate (63 mg, 0.6 mmol) and *p*-TSA.H<sub>2</sub>O (6 mg, 0.03 mmol). After stirring the reaction mixture at 25 °C for 15 min the crude reaction mixture was worked up with aqueous NaHCO<sub>3</sub> solution and the aqueous layer was extracted with dichloromethane (3 x 10 mL). The combined organic layers were dried over (Na<sub>2</sub>SO<sub>4</sub>), filtered and concentrated. Pure chiral acetal product **10'aa** was obtained by column chromatography (silica gel, mixture of hexane/ethyl acetate 10:1).

In an oven dried round bottomed flask a solution of above acetal product **10'aa** (70 mg, 0.136 mmol) and LiAlH<sub>4</sub> (52 mg, 1.36 mmol) in dry THF (3 mL) was stirred under N<sub>2</sub> atmosphere in an ice bath and allowed to slowly warm to room temperature followed by reflux at 70 °C for about 24 h, then the mixture was quenched with EtOAc (1 mL), MeOH (1 mL), H<sub>2</sub>O (5 mL), and then extracted with EtOAc three times, dried over Na<sub>2</sub>SO<sub>4</sub> and concentrated. The residue was purified by column chromatography on silica gel (hexane/EtOAc = 10:1).

**Procedure E: All racemic products 7aa–kp were prepared in 40-85% yield and 45-99% *de* through *r*-M reaction as shown below:** In an ordinary glass vial equipped with a magnetic stirring bar, a mixture of (±)-DPPOTMS **3** (19.6 mg, 0.06 mmol) in CHCl<sub>3</sub> (0.6 mL) was added functionalized 2-hydroxycinnamaldehydes **1a-k** (0.36 mmol) and allowed to stir for 10 min followed by addition of **2a-p** (0.3 mmol). After stirring the reaction mixture at 25 °C for 7-12 h, was added 1.0 mL CHCl<sub>3</sub> and Ph<sub>3</sub>P=CHCO<sub>2</sub>Et **6** (209 mg, 0.6 mmol). After stirring the reaction mixture for 2 h the reaction mixture was loaded on to silica gel column directly eluting with hexane/EtOAc (10:1 to 10:2).

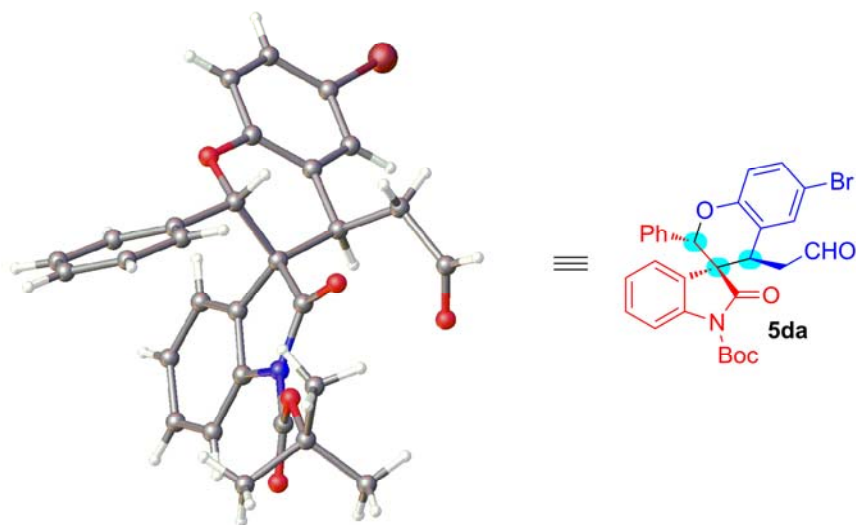

**Figure S1.** Crystal structure of functionalized spiro[chroman-3,3'-indolin]-2'-one (**5da**).

**Figure S2:** HRMS experiment see the formation of catalytic species of animals.

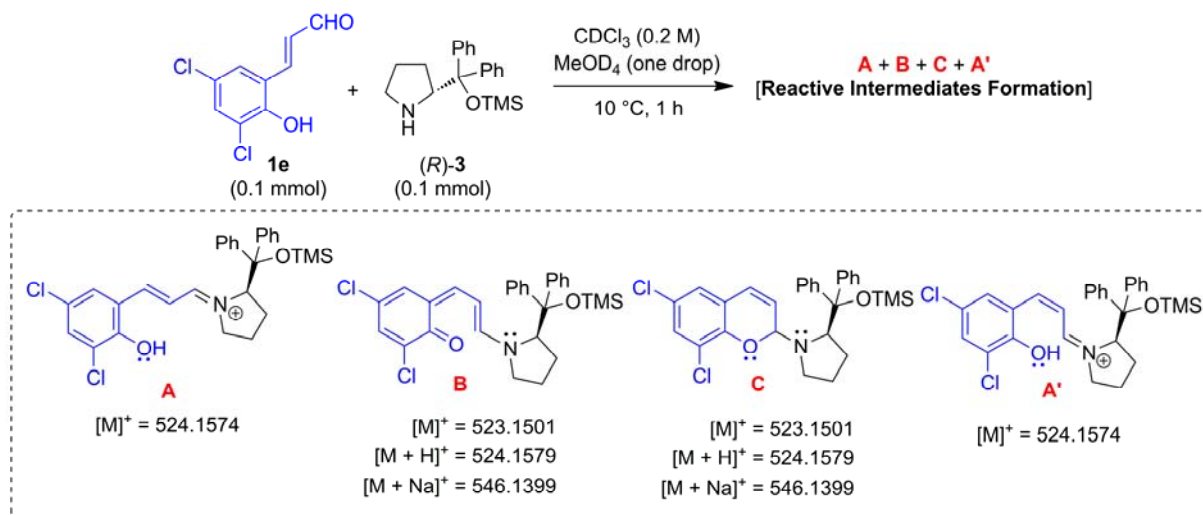

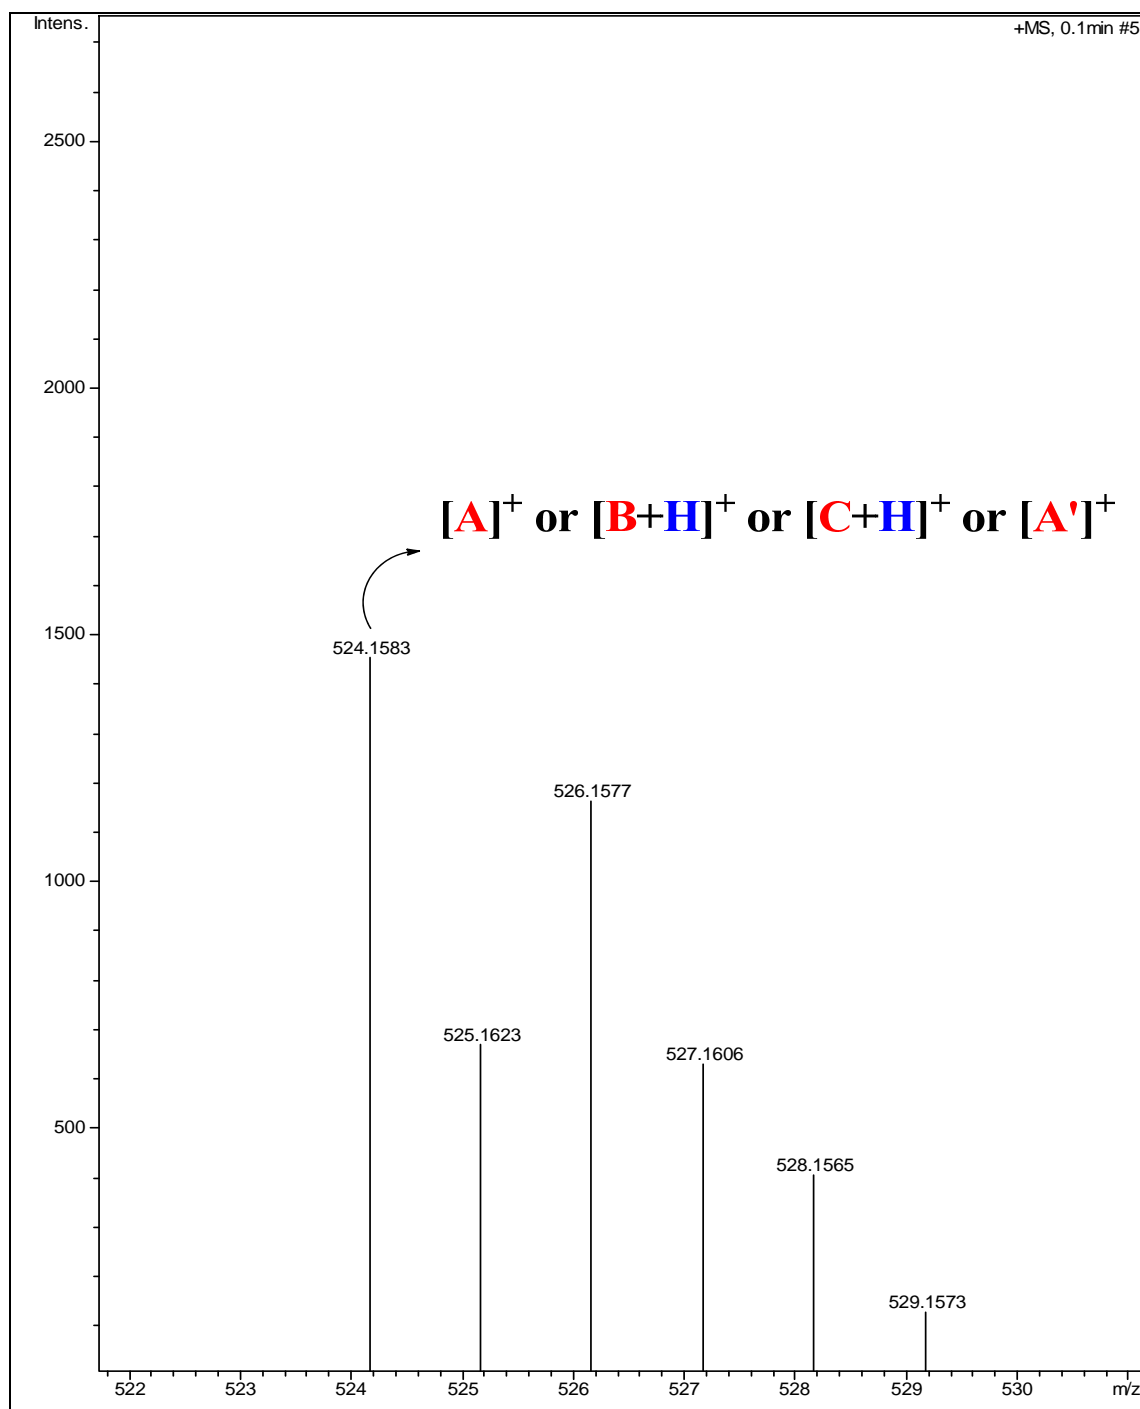

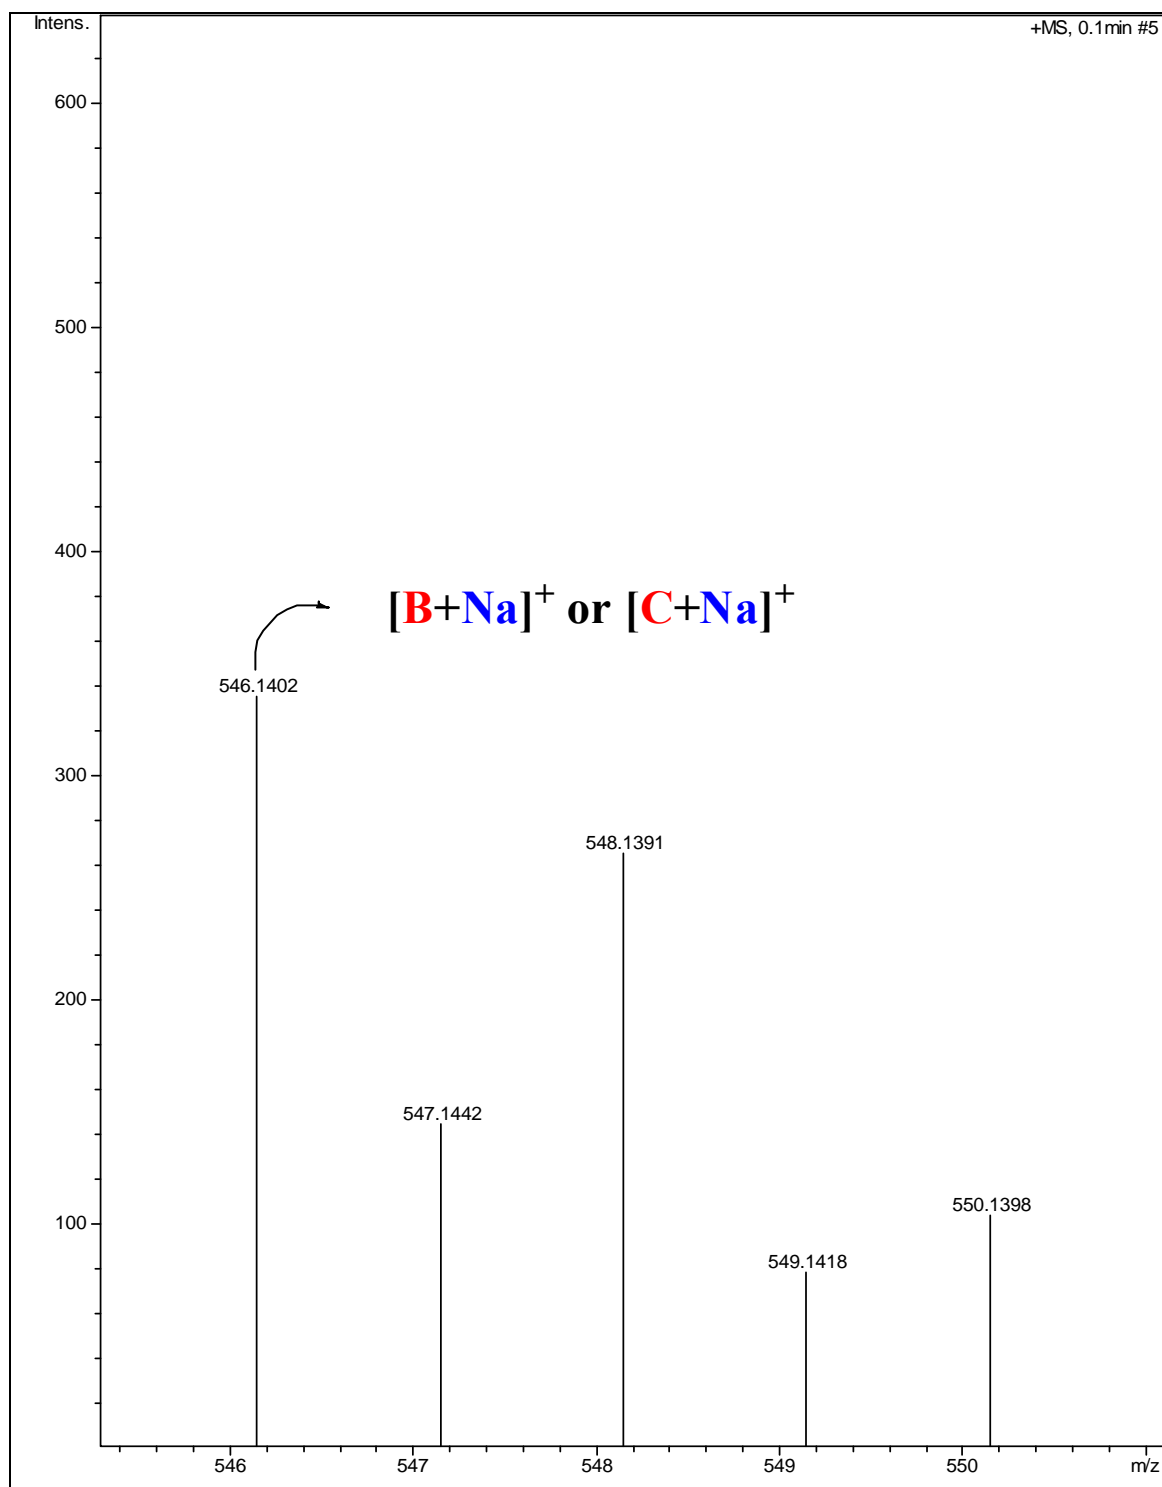

**(2*S*,3*S*,4*R*)-tert-butyl-2'-oxo-4-(2-oxoethyl)-2-phenylspiro[chroman-3,3'-indoline]-1'-**

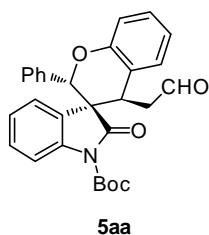

**5aa**

**carboxylate (5aa):** Prepared by following the procedure **A** and purified by column chromatography using EtOAc/hexane and isolated as white gummy solid.  $[\alpha]_D^{25} = +4.71^\circ$  ( $c = 1.0$  g/100 mL,  $\text{CHCl}_3$ ); IR (Neat):  $\nu_{\text{max}}$  2978, 1786, 1736, 1726, 1481, 1248, 1149, 1056, 841 and 750  $\text{cm}^{-1}$ ;  $^1\text{H}$  NMR ( $\text{CDCl}_3$ )  $\delta$  9.81 (1H, br s), 7.57-7.54 (1H, m), 7.32-7.22 (2H, m), 7.20-7.15 (2H, m), 7.11-7.02 (4H, m), 7.00-6.92 (3H, m), 6.84 (1H, d,  $J = 7.6$  Hz), 5.37 (1H, s), 4.14 (1H, dd,  $J = 18.8, 10.0$  Hz), 3.91 (1H, d,  $J = 9.2$  Hz), 2.79 (1H, dd,  $J = 18.8, 2.8$  Hz), 1.50 (9H, s,  $\text{C}(\text{CH}_3)_3$ );  $^{13}\text{C}$  NMR ( $\text{CDCl}_3$ , DEPT-135)  $\delta$  198.9 (CH, CHO), 174.7 (C, N-C=O), 154.2 (C, NCO<sub>2</sub>), 148.1 (C), 139.0 (C), 134.7 (C), 129.9 (CH), 128.6 (CH), 128.5 (CH), 128.4 (CH), 127.8 (2 x CH), 127.7 (C), 127.5 (2 x CH), 124.7 (CH), 124.3 (CH), 123.4 (C), 122.1 (CH), 117.0 (CH), 114.5 (CH), 84.1 (C), 77.4 (CH), 52.6 (C), 49.4 (CH<sub>2</sub>), 37.1 (CH), 27.8 (3 x CH<sub>3</sub>); HRMS  $m/z$  470.1967 (M+H), calcd for  $\text{C}_{29}\text{H}_{27}\text{NO}_5\text{H}$  470.1967.

**(2*S*,3*S*,4*R*)-tert-butyl-4-((*E*)-4-ethoxy-4-oxobut-2-en-1-yl)-2'-oxo-2-phenylspiro[chroman-**

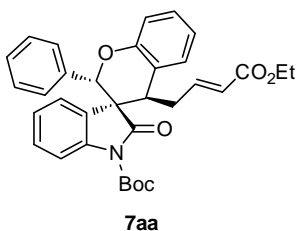

**7aa**

**3,3'-indoline]-1'-carboxylate (7aa):** Prepared by following the procedure **B** and purified by column chromatography using EtOAc/hexane and isolated as pale yellow viscous liquid. The enantiomeric excess (*ee*) was determined by chiral stationary phase HPLC using a Chiral Lux 5u Cellulose-2 column (hexane/2-propanol = 98:2, flow rate 0.5 mL/min,  $\lambda = 254$  nm),  $t_R = 38.0$  min (major),  $t_R = 43.0$  min (minor).  $[\alpha]_D^{25} = -34.2^\circ$  ( $c = 0.19$  g/100 mL,  $\text{CHCl}_3$ , 99% *ee*); IR (Neat):  $\nu_{\text{max}}$  2981, 1790, 1755, 1717, 1493, 1250, 1200, 1148, 1044, 841 and 750  $\text{cm}^{-1}$ ;  $^1\text{H}$  NMR ( $\text{CDCl}_3$ )  $\delta$  7.55 (1H, d,  $J = 8.4$  Hz), 7.33-7.29 (1H, m), 7.22-7.06 (6H, m), 7.03-6.92 (5H, m), 6.68 (1H, d,  $J = 7.6$  Hz), 5.85 (1H, d,  $J = 15.6$  Hz), 5.58 (1H, s), 4.17 (2H, q,  $J = 7.2$  Hz), 3.46 (1H, br td,  $J = 14.8, 5.2$  Hz), 3.13 (1H, t,  $J = 6.4$  Hz), 2.85 (1H, br td,  $J = 14.4, 8.0$  Hz), 1.54 (9H, s), 1.27 (3H, t,  $J = 7.2$  Hz);  $^{13}\text{C}$  NMR ( $\text{CDCl}_3$ , DEPT-135)  $\delta$  173.8 (C, N-C=O), 166.3 (C, O-C=O), 154.1 (C, N-CO<sub>2</sub>), 148.4 (C), 146.5 (CH), 138.9 (C), 135.3 (C), 130.6 (CH), 128.8 (CH), 128.7 (CH), 128.5 (CH), 127.9 (2 x CH), 127.8 (C), 127.6 (2 x CH), 125.0 (CH), 124.3 (CH), 123.6 (CH), 122.0 (C), 121.4 (CH), 117.0 (CH), 114.3 (CH), 84.3 (C), 77.4 (CH), 60.2 (CH<sub>2</sub>), 53.7 (C), 43.1 (CH), 36.4 (CH<sub>2</sub>), 28.0 (3 x CH<sub>3</sub>), 14.3 (CH<sub>3</sub>); HRMS  $m/z$  562.2208 (M + Na), calcd for  $\text{C}_{33}\text{H}_{33}\text{NO}_6\text{Na}$  562.2206.

**(E)-ethyl-4-((2S,3S,4R)-1'-acetyl-2'-oxo-2-phenylspiro[chroman-3,3'-indolin]-4-yl)but-2-**

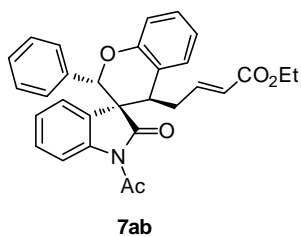

**enoate (7ab):** Prepared following the procedure **B** and purified by column chromatography using EtOAc/hexane and isolated as white gummy solid. The enantiomeric excess (*ee*) was determined by chiral stationary phase HPLC using a Chiral Lux 5u Cellulose-2 column (hexane/2-propanol = 98:2, flow rate 0.5 mL/min,  $\lambda = 254$  nm),  $t_R = 33.47$  min (major),  $t_R = 55.41$  min (minor).  $[\alpha]_D^{25} = -36.0^\circ$  ( $c = 0.31$  g/100 mL,  $\text{CHCl}_3$ , 84% *ee*); IR (Neat):  $\nu_{\text{max}}$  3030, 2980, 1753, 1725, 1649, 1479, 1309, 980, 761 and 701  $\text{cm}^{-1}$ ;  $^1\text{H}$  NMR ( $\text{CDCl}_3$ )  $\delta$  8.02 (1H, d,  $J = 8.4$  Hz), 7.36-7.18 (3H, m), 7.14-7.09 (4H, m), 7.07-7.00 (5H, m), 6.77 (1H, dd,  $J = 8.0, 2.0$  Hz), 5.87 (1H, td,  $J = 14.4, 1.2$  Hz), 5.56 (1H, s), 4.19 (2H, q,  $J = 7.2$  Hz), 3.45 (1H, dtd,  $J = 14.8, 6.4, 1.2$  Hz), 3.21 (1H, t,  $J = 6.4$  Hz), 2.85 (1H, dtd,  $J = 14.8, 6.4, 1.2$  Hz), 2.48 (3H, s,  $\text{CH}_3\text{CO}$ ), 1.29 (3H, t,  $J = 7.2$  Hz);  $^{13}\text{C}$  NMR ( $\text{CDCl}_3$ , DEPT-135)  $\delta$  176.3 (C, N-C=O), 170.3 (C, N-C=O), 166.2 (C, O-C=O), 154.1 (C), 146.5 (CH), 139.2 (C), 135.0 (C), 130.5 (CH), 128.9 (3 x CH), 128.0 (C), 127.9 (2 x CH), 127.7 (2 x CH), 125.2 (CH), 124.8 (CH), 123.5 (CH), 122.0 (C), 121.6 (CH), 117.0 (CH), 115.9 (CH), 77.4 (CH), 60.3 ( $\text{CH}_2$ ), 53.7 (C), 43.4 (CH), 36.6 ( $\text{CH}_2$ ), 26.7 ( $\text{CH}_3$ ), 14.3 ( $\text{CH}_3$ ); HRMS  $m/z$  504.1787 (M+Na), calcd for  $\text{C}_{30}\text{H}_{27}\text{NO}_5\text{Na}$  504.1787.

**(E)-ethyl-4-((2S,3S,4R)-2'-oxo-2-phenyl-1'-tosylspiro[chroman-3,3'-indolin]-4-yl)but-2-**

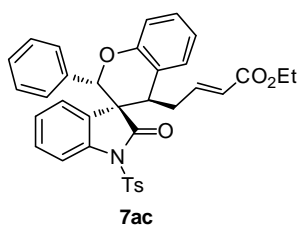

**enoate (7ac):** Prepared following the procedure **B** and purified by column chromatography using EtOAc/hexane and isolated as pale yellow gummy solid. The enantiomeric excess (*ee*) was determined by chiral stationary phase HPLC using a Chiralpak AD-H column (hexane/2-propanol = 90:10, flow rate 1.0 mL/min,  $\lambda = 254$  nm),  $t_R = 20.84$  min (major),  $t_R = 36.36$  min (minor).  $[\alpha]_D^{25} = -109.56^\circ$  ( $c = 0.20$  g/100 mL,  $\text{CHCl}_3$ , 96% *ee*); IR (Neat):  $\nu_{\text{max}}$  2926, 1753, 1720, 1484, 1386, 1188, 1150, 958 and 744  $\text{cm}^{-1}$ ;  $^1\text{H}$  NMR ( $\text{CDCl}_3$ )  $\delta$  7.70 (3H, br d,  $J = 8.4$  Hz), 7.33-7.24 (5H, m), 7.08-7.00 (5H, m), 6.85 (2H, t,  $J = 7.6$  Hz), 6.72 (2H, d,  $J = 8.0$  Hz), 6.69-6.64 (1H, m), 5.30 (1H, d,  $J = 15.6$  Hz), 5.25 (1H, s), 4.13 (2H, q,  $J = 7.2$  Hz), 4.02 (1H, t,  $J = 6.0$  Hz), 2.45 (3H, s,  $\text{ArCH}_3$ ), 2.29-2.21 (1H, m), 2.05-1.97 (1H, m), 1.27 (3H, t,  $J = 7.2$  Hz);  $^{13}\text{C}$  NMR ( $\text{CDCl}_3$ , DEPT-135)  $\delta$  175.0 (C, N-C=O), 165.7 (C, O-C=O), 154.3 (C), 145.4 (C), 144.9 (CH), 139.7 (C), 134.9 (C), 134.2 (C), 129.7 (2 x CH),



129.4 (CH), 128.4 (2 x CH), 127.8 (2 x CH), 127.6 (3 x CH), 127.0 (2 x CH), 126.5 (CH), 124.6 (CH), 124.4 (C), 122.7 (C), 122.7 (CH), 122.1 (CH), 117.0 (CH), 113.2 (CH), 81.8 (CH), 60.2 (CH<sub>2</sub>), 55.5 (C), 42.0 (CH), 33.5 (CH<sub>2</sub>), 21.7 (CH<sub>3</sub>), 14.2 (CH<sub>3</sub>); HRMS m/z 616.1770 (M+Na), calcd for C<sub>35</sub>H<sub>31</sub>NO<sub>6</sub>SNa 616.1770.

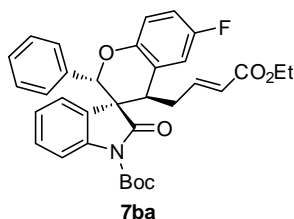

**(2S,3S,4R)-tert-butyl-4-((E)-4-ethoxy-4-oxobut-2-en-1-yl)-6-fluoro-2'-oxo-2-phenylspiro[chroman-3,3'-indoline]-1'-carboxylate (7ba):**

Prepared by following the procedure **B** and purified by column chromatography using EtOAc/hexane and isolated as white solid with M.P. 51°C. The enantiomeric excess (*ee*) was determined by chiral stationary phase HPLC using a Chiral Lux 5u Cellulose-2 column (hexane/2-propanol = 95:5, flow rate 0.5 mL/min,  $\lambda$  = 254 nm),  $t_R$  = 15.89 min (major),  $t_R$  = 24.74 min (minor).  $[\alpha]_D^{25} = -22.97^\circ$  ( $c = 0.58$  g/100 mL, CHCl<sub>3</sub>, 91% *ee*); IR (Neat):  $\nu_{\max}$  2981, 1790, 1752, 1717, 1493, 1347, 1287, 1250, 1148, 1044, 842 and 749 cm<sup>-1</sup>; <sup>1</sup>H NMR (CDCl<sub>3</sub>)  $\delta$  7.55 (1H, d,  $J = 8.0$  Hz), 7.35-6.95 (10H, m), 6.80 (1H, d,  $J = 8.4$  Hz), 6.70 (1H, d,  $J = 7.6$  Hz), 5.86 (1H, d,  $J = 15.6$  Hz), 5.52 (1H, s), 4.17 (2H, q,  $J = 6.8$  Hz), 3.41 (1H, br td,  $J = 14.8, 5.2$  Hz), 3.11 (1H, t,  $J = 6.0$  Hz), 2.85 (1H, br td,  $J = 14.4, 8.0$  Hz), 1.53 (9H, s), 1.27 (3H, t,  $J = 6.8$  Hz); <sup>13</sup>C NMR (CDCl<sub>3</sub>, DEPT-135)  $\delta$  173.5 (C, N-C=O), 166.1 (C, O-C=O), 157.0 (C, d,  $J = 239.1$  Hz, C-F), 150.1 (C, N-CO<sub>2</sub>), 148.4 (C), 145.8 (CH), 138.9 (C), 135.0 (C), 128.9 (CH), 128.6 (CH), 127.8 (2 x CH), 127.6 (2 x CH), 127.5 (C), 124.9 (CH), 124.4 (CH), 124.0 (CH), 123.3 (C, d,  $J = 7.0$  Hz), 118.1 (CH, d,  $J = 7.8$  Hz), 116.2 (CH, d,  $J = 22.2$  Hz), 116.0 (CH, d,  $J = 22.5$  Hz), 114.4 (CH), 84.4 (C), 77.7 (CH), 60.3 (CH<sub>2</sub>), 53.4 (C), 43.1 (CH), 36.2 (CH<sub>2</sub>), 27.9 (3 x CH<sub>3</sub>), 14.2 (CH<sub>3</sub>); HRMS m/z 580.2110 (M+Na), calcd for C<sub>33</sub>H<sub>32</sub>FNO<sub>6</sub>Na 580.2112.

**(2S,3S,4R)-tert-butyl-6-chloro-4-((E)-4-ethoxy-4-oxobut-2-en-1-yl)-2'-oxo-2-**

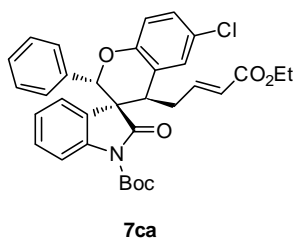

**phenylspiro[chroman-3,3'-indoline]-1'-carboxylate (7ca):** Prepared by following the procedure **B** and purified by column chromatography using EtOAc/hexane and isolated as pale yellow viscous liquid. The enantiomeric excess (*ee*) was determined by chiral stationary phase HPLC using a Daicel Chiralcel OD-H column

(hexane/2-propanol = 98:2, flow rate 0.5 mL/min,  $\lambda$  = 254 nm),  $t_R$  = 20.50 min (major),  $t_R$  = 24.70 min (minor).  $[\alpha]_D^{25} = -29.7^\circ$  ( $c = 0.35$  g/100 mL, CHCl<sub>3</sub>, 96% *ee*); IR (Neat):  $\nu_{\max}$  2980,

1784, 1758, 1722, 1652, 1605, 1479, 1350, 1250, 1150 and 753  $\text{cm}^{-1}$ ;  $^1\text{H}$  NMR ( $\text{CDCl}_3$ )  $\delta$  7.55 (1H, d,  $J = 8.4$  Hz), 7.30-7.16 (3H, m), 7.11-7.07 (3H, m), 7.03-6.95 (5H, m), 6.69 (1H, d,  $J = 7.2$  Hz), 5.86 (1H, d,  $J = 16.0$  Hz), 5.53 (1H, s), 4.18 (2H, q,  $J = 7.2$  Hz), 3.34 (1H, dtd,  $J = 14.0, 6.8, 1.2$  Hz), 3.11 (1H, t,  $J = 6.4$  Hz), 2.85 (1H, br td,  $J = 14.8, 8.0$  Hz), 1.53 (9H, s), 1.28 (3H, t,  $J = 7.2$  Hz);  $^{13}\text{C}$  NMR ( $\text{CDCl}_3$ , DEPT-135)  $\delta$  173.4 (C, N-C=O), 166.1 (C, O-C=O), 152.7 (N-CO<sub>2</sub>), 148.3 (C), 145.7 (CH), 138.9 (C), 134.8 (C), 129.9 (CH), 129.0 (CH), 128.9 (CH), 128.7 (CH), 127.8 (2 x CH), 127.7 (2 x CH), 127.4 (C), 126.1 (C), 124.9 (CH), 124.4 (CH), 124.1 (CH), 123.7 (C), 118.4 (CH), 114.5 (CH), 84.5 (C), 77.7 (CH), 60.3 (CH<sub>2</sub>), 53.3 (C), 42.9 (CH), 36.2 (CH<sub>2</sub>), 28.0 (3 x CH<sub>3</sub>), 14.3 (CH<sub>3</sub>); HRMS  $m/z$  596.1818 (M + Na), calcd for C<sub>33</sub>H<sub>32</sub>ClNO<sub>6</sub>Na 596.1816.

**(2S,3S,4R)-tert-butyl-6-bromo-4-((E)-4-ethoxy-4-oxobut-2-en-1-yl)-2'-oxo-2-**

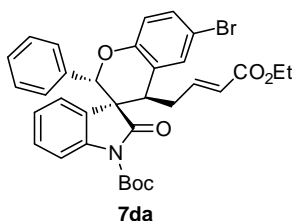

**7da**

**phenylspiro[chroman-3,3'-indoline]-1'-carboxylate (7da):** Prepared

by following the procedure **B** and purified by column chromatography using EtOAc/hexane and isolated as pale brown solid with M.P. 54°C.

The enantiomeric excess (*ee*) was determined by chiral stationary phase HPLC using a Daicel Chiralcel OD-H column (hexane/2-propanol =

98:2, flow rate 0.5 mL/min,  $\lambda = 254$  nm),  $t_R = 22.52$  min (major),  $t_R = 28.0$  min (minor).  $[\alpha]_D^{25} = -18.8^\circ$  ( $c = 0.19$  g/100 mL,  $\text{CHCl}_3$ , 92% *ee*); IR (Neat):  $\nu_{\text{max}}$  2981, 1789, 1749, 1719, 1498, 1346, 1277, 1251, 1149, 1104, 1045, 816 and 751  $\text{cm}^{-1}$ ;  $^1\text{H}$  NMR ( $\text{CDCl}_3$ )  $\delta$  7.55 (1H, d,  $J = 8.0$  Hz), 7.40 (1H, dd,  $J = 8.8, 2.4$  Hz), 7.24-7.15 (3H, m), 7.08 (2H, t,  $J = 8$  Hz), 6.99-6.92 (5H, m), 6.69 (1H, d,  $J = 7.6$  Hz), 5.86 (1H, d,  $J = 15.6$  Hz), 5.52 (1H, s), 4.18 (2H, q,  $J = 7.2$  Hz), 3.39 (1H, br td,  $J = 14.4, 5.6$  Hz), 3.10 (1H, t,  $J = 6.0$  Hz), 2.84 (1H, br td,  $J = 14.4, 7.6$  Hz), 1.53 (9H, s), 1.28 (3H, t,  $J = 7.2$  Hz);  $^{13}\text{C}$  NMR ( $\text{CDCl}_3$ , DEPT-135)  $\delta$  173.3 (C, N-C=O), 166.0 (C, O-C=O), 153.2 (C, N-CO<sub>2</sub>), 148.2 (C), 145.5 (CH), 138.8 (C), 134.7 (C), 132.8 (CH), 131.7 (CH), 128.8 (CH), 128.6 (CH), 127.7 (2 x CH), 127.5 (2 x CH), 127.2 (C), 124.8 (CH), 124.3 (CH), 124.1 (C), 124.0 (CH), 118.7 (CH), 114.4 (CH), 113.3 (C), 84.4 (C), 77.6 (CH), 60.2 (CH<sub>2</sub>), 53.2 (C), 42.7 (CH), 36.2 (CH<sub>2</sub>), 27.8 (3 x CH<sub>3</sub>), 14.2 (CH<sub>3</sub>); HRMS  $m/z$  640.1310 (M + Na), calcd for C<sub>33</sub>H<sub>32</sub>BrNO<sub>6</sub>Na 640.1311.

**(2*S*,3*S*,4*R*)-tert-butyl-6,8-dichloro-4-((*E*)-4-ethoxy-4-oxobut-2-en-1-yl)-2'-oxo-2-**

**phenylspiro[chroman-3,3'-indoline]-1'-carboxylate (7ea):** Prepared by following the

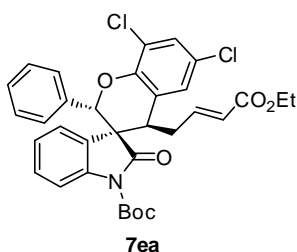

procedure **B** and purified by column chromatography using EtOAc/hexane and isolated as white gummy solid. The enantiomeric excess (*ee*) was determined by chiral stationary phase HPLC using a Daicel Chiralcel OD-H column (hexane/2-propanol = 95:5, flow rate 0.5 mL/min,  $\lambda = 254$  nm),  $t_R = 15.55$  min (major),  $t_R = 19.4$  min

(minor).  $[\alpha]_D^{25} = +6.8^\circ$  ( $c = 0.38$  g/100 mL,  $\text{CHCl}_3$ , 81% *ee*); IR (Neat):  $\nu_{\text{max}}$  3068, 2975, 2899, 1764, 1726, 1644, 1479, 1463, 1353, 1156, 1046, and 866  $\text{cm}^{-1}$ ;  $^1\text{H}$  NMR ( $\text{CDCl}_3$ )  $\delta$  7.55 (1H, d,  $J = 8.0$  Hz), 7.43 (1H, d,  $J = 2.4$  Hz), 7.27-7.15 (2H, m), 7.10 (2H, t,  $J = 7.6$  Hz), 7.03-6.88 (5H, m), 6.54 (1H, d,  $J = 7.6$  Hz), 5.85 (1H, d,  $J = 15.6$  Hz), 5.66 (1H, s), 4.18 (2H, q,  $J = 7.2$  Hz), 3.44 (1H, br td,  $J = 14.8, 5.2$  Hz), 3.10 (1H, t,  $J = 6.8$  Hz), 2.80 (1H, br td,  $J = 14.4, 8.0$  Hz), 1.55 (9H, s), 1.28 (3H, t,  $J = 7.2$  Hz);  $^{13}\text{C}$  NMR ( $\text{CDCl}_3$ , DEPT-135)  $\delta$  173.2 (C, N-C=O), 166.0 (C, O-C=O), 148.6 (C, N-CO<sub>2</sub>), 148.3 (C), 145.1 (CH), 138.8 (C), 134.4 (C), 129.3 (CH), 129.1 (CH), 128.7 (CH), 128.5 (CH), 127.7 (4 x CH), 126.9 (C), 125.7 (C), 124.9 (C), 124.7 (CH), 124.5 (CH), 124.4 (CH), 122.7 (C), 114.6 (CH), 84.7 (C), 78.4 (CH), 60.4 (CH<sub>2</sub>), 53.3 (C), 43.2 (CH), 35.8 (CH<sub>2</sub>), 28.0 (3 x CH<sub>3</sub>), 14.2 (CH<sub>3</sub>); HRMS  $m/z$  630.1426 (M +Na), calcd for C<sub>33</sub>H<sub>31</sub>Cl<sub>2</sub>NO<sub>6</sub>Na 630.1426.

**(2*S*,3*S*,4*R*)-tert-butyl-4-((*E*)-4-ethoxy-4-oxobut-2-en-1-yl)-6-nitro-2'-oxo-2-**

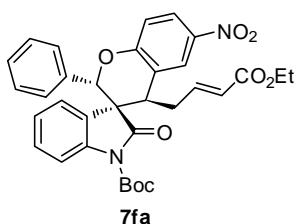

**phenylspiro[chroman-3,3'-indoline]-1'-carboxylate (7fa):** Prepared by following the procedure **B** and purified by column chromatography using EtOAc/hexane and isolated as pale yellow solid with M.P. is 56°C. The enantiomeric excess (*ee*) was determined by chiral stationary phase HPLC using a Daicel Chiralpak AD-H column (hexane/2-

propanol = 97:3, flow rate 1.0 mL/min,  $\lambda = 254$  nm),  $t_R = 13.50$  min (minor),  $t_R = 15.68$  min (major).  $[\alpha]_D^{25} = +6.48^\circ$  ( $c = 0.74$  g/100 mL,  $\text{CHCl}_3$ , 28% *ee*); IR (Neat):  $\nu_{\text{max}}$  2986, 2920, 2844, 1764, 1726, 1655, 1583, 1518, 1479, 1348, 1145 and 1107  $\text{cm}^{-1}$ ;  $^1\text{H}$  NMR ( $\text{CDCl}_3$ )  $\delta$  8.23 (1H, dd,  $J = 9.2, 2.8$  Hz), 8.06 (1H, d,  $J = 2.8$  Hz), 7.59 (1H, d,  $J = 8.4$  Hz), 7.24-7.17 (3H, m), 7.13 (2H, t,  $J = 8.0$  Hz), 6.97 (2H, d,  $J = 7.2$  Hz), 6.95 (2H, m), 6.53 (1H, d,  $J = 7.6$  Hz), 5.83 (1H, d,  $J = 15.6$  Hz), 5.65 (1H, s), 4.17 (2H, q,  $J = 7.2$  Hz), 3.40 (1H, br td,  $J = 14.0, 5.2$  Hz),

3.24 (1H, br t,  $J = 7.2$  Hz), 2.85 (1H, br td,  $J = 14.8, 8$  Hz), 1.55 (9H, s), 1.27 (3H, t,  $J = 7.2$  Hz);  $^{13}\text{C}$  NMR ( $\text{CDCl}_3$ , DEPT-135)  $\delta$  172.9 (C, N-C=O), 165.8 (C, O-C=O), 159.4 (C, N-CO<sub>2</sub>), 148.2 (C), 144.5 (CH), 141.6 (C), 139.0 (C), 134.1 (C), 129.3 (CH), 129.0 (CH), 127.8 (4 x CH), 126.7 (C), 126.6 (CH), 124.9 (CH), 124.8 (CH), 124.5 (CH), 124.4 (CH), 122.8 (C), 117.7 (CH), 114.8 (CH), 84.8 (C), 78.6 (CH), 60.5 (CH<sub>2</sub>), 53.0 (C), 42.6 (CH), 35.8 (CH<sub>2</sub>), 28.0 (3 x CH<sub>3</sub>), 14.2 (CH<sub>3</sub>); HRMS  $m/z$  607.2057 (M + Na), calcd for C<sub>33</sub>H<sub>32</sub>N<sub>2</sub>O<sub>8</sub>Na 607.2057.

**(2S,3S,4R)-tert-butyl-4-((E)-4-ethoxy-4-oxobut-2-en-1-yl)-6-methoxy-2'-oxo-2-phenylspiro[chroman-3,3'-indoline]-1'-carboxylate (7ga):** Prepared by following the

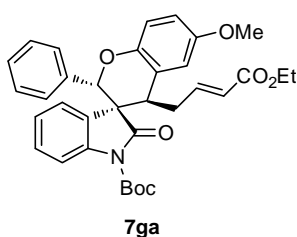

**7ga**

procedure **B** and purified by column chromatography using EtOAc/hexane and isolated as pale yellow gummy solid. The enantiomeric excess (*ee*) was determined by chiral stationary phase HPLC using a Chiral Lux 5u Cellulose-1 column (hexane/2-propanol = 98:2, flow rate 0.5 mL/min,  $\lambda = 254$  nm),  $t_R = 22.61$  min (major),  $t_R$

= 27.55 min (minor).  $[\alpha]_D^{25} = -18.4^\circ$  ( $c = 1.0$  g/100 mL,  $\text{CHCl}_3$ , 93% *ee*); IR (Neat):  $\nu_{\text{max}}$  2981, 1788, 1733, 1716, 1606, 1497, 1345, 1208, 1148, 1036, 839 and 749  $\text{cm}^{-1}$ ;  $^1\text{H}$  NMR ( $\text{CDCl}_3$ )  $\delta$  7.54 (1H, d,  $J = 8.0$  Hz), 7.23-7.15 (2H, m), 7.10-6.97 (7H, m), 6.89 (1H, br dd,  $J = 9.2, 2.8$  Hz), 6.77-6.74 (1H, m), 6.57 (1H, d,  $J = 3.2$  Hz), 5.87 (1H, d,  $J = 15.6$  Hz), 5.52 (1H, s), 4.17 (2H, q,  $J = 7.2$  Hz), 3.77 (3H, s, OCH<sub>3</sub>), 3.49-3.42 (1H, m), 3.10 (1H, dd,  $J = 11.2, 6.0$  Hz), 2.87 (1H, br td,  $J = 14.8, 8.4$  Hz), 1.53 (9H, s), 1.27 (3H, t,  $J = 7.2$  Hz);  $^{13}\text{C}$  NMR ( $\text{CDCl}_3$ , DEPT-135)  $\delta$  173.8 (C, N-C=O), 166.3 (C, O-C=O), 153.7 (C, N-CO<sub>2</sub>), 148.4 (C), 148.0 (C), 146.6 (CH), 138.8 (C), 135.3 (C), 128.7 (CH), 128.5 (CH), 127.9 (2 x CH), 127.8 (C), 127.6 (2 x CH), 125.1 (CH), 124.4 (CH), 123.6 (CH), 122.3 (C), 117.8 (CH), 115.7 (CH), 114.3 (CH), 114.2 (CH), 84.3 (C), 77.4 (CH), 60.2 (CH<sub>2</sub>), 55.6 (CH<sub>3</sub>, OCH<sub>3</sub>), 53.7 (C), 43.4 (CH), 36.4 (CH<sub>2</sub>), 28.0 (3 x CH<sub>3</sub>), 14.3 (CH<sub>3</sub>); HRMS  $m/z$  592.2312 (M + Na), calcd for C<sub>34</sub>H<sub>35</sub>NO<sub>7</sub>Na 592.2312.

**(2S,3S,4R)-tert-butyl-4-((E)-4-ethoxy-4-oxobut-2-en-1-yl)-7-methoxy-2'-oxo-2-**

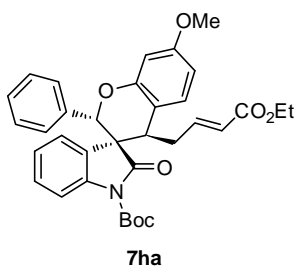

**7ha**

**phenylspiro[chroman-3,3'-indoline]-1'-carboxylate (7ha):** Prepared by following the procedure **B** and purified by column chromatography using EtOAc/hexane and isolated as yellow viscous liquid; The enantiomeric excess (*ee*) was determined by chiral stationary phase HPLC using a Daicel Chiralpak AD-H column (hexane/2-propanol =

98:2, flow rate 0.5 mL/min,  $\lambda = 254$  nm),  $t_R = 20.67$  min (major),  $t_R = 44.54$  min (minor).  $[\alpha]_D^{25} = -13.2^\circ$  ( $c = 0.38$  g/100 mL,  $\text{CHCl}_3$ , >99.9% *ee*); IR (Neat):  $\nu_{\text{max}}$  2922, 1790, 1732, 1717, 1471, 1286, 1149, 1043, 841 and  $752$   $\text{cm}^{-1}$ ;  $^1\text{H}$  NMR ( $\text{CDCl}_3$ )  $\delta$  7.54 (1H, d,  $J = 8.4$  Hz), 7.23-7.15 (2H, m), 7.11-7.06 (2H, m), 7.0-6.94 (5H, m), 6.71 (1H, dd,  $J = 7.6, 0.8$  Hz), 6.62-6.58 (2H, m), 5.85 (1H, d,  $J = 15.6$  Hz), 5.56 (1H, s), 4.17 (2H, q,  $J = 7.2$  Hz), 3.84 (3H, s,  $\text{OCH}_3$ ), 3.39 (1H, br dtd,  $J = 14.4, 8.4, 1.6$  Hz), 3.08 (1H, dd,  $J = 7.6, 5.2$  Hz), 2.82 (1H, br td,  $J = 14.4, 8.4$  Hz), 1.53 (9H, s), 1.27 (3H, t,  $J = 7.2$  Hz);  $^{13}\text{C}$  NMR ( $\text{CDCl}_3$ , DEPT-135)  $\delta$  173.8 (C,  $\text{N-C=O}$ ), 166.4 (C,  $\text{O-C=O}$ ), 160.0 (C,  $\text{N-CO}_2$ ), 154.9 (C), 148.4 (C), 146.6 (CH), 138.9 (C), 135.2 (C), 131.2 (CH), 128.7 (CH), 128.5 (CH), 127.9 (2 x CH), 127.8 (C), 127.6 (2 x CH), 125.1 (CH), 124.3 (CH), 123.6 (CH), 114.3 (CH), 114.0 (C), 108.6 (CH), 101.3 (CH), 84.4 (C), 77.5 (CH), 60.2 ( $\text{CH}_2$ ), 55.4 ( $\text{CH}_3$ ,  $\text{OCH}_3$ ), 53.8 (C), 42.6 (CH), 36.5 ( $\text{CH}_2$ ), 28.0 (3 x  $\text{CH}_3$ ), 14.3 ( $\text{CH}_3$ ); HRMS  $m/z$  592.2312 ( $\text{M} + \text{Na}$ ), calcd for  $\text{C}_{34}\text{H}_{35}\text{NO}_7\text{Na}$  592.2312.

**(2S,3S,4R)-tert-butyl-4-((E)-4-ethoxy-4-oxobut-2-en-1-yl)-8-hydroxy-2'-oxo-2-**

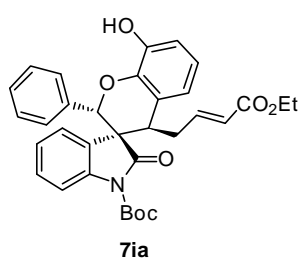

**7ia**

**phenylspiro[chroman-3,3'-indoline]-1'-carboxylate (7ia):** Prepared by following the procedure **B** and purified by column chromatography using EtOAc/hexane and isolated as yellow viscous liquid. The enantiomeric excess (*ee*) was determined by chiral stationary phase HPLC using a Chiral Lux 5u Cellulose-1 column (hexane/2-propanol = 97:3, flow rate 0.5 mL/min,  $\lambda = 254$  nm),  $t_R = 35.82$  min (major),  $t_R =$

44.28 min (minor).  $[\alpha]_D^{25} = -21.0^\circ$  ( $c = 0.71$  g/100 mL,  $\text{CHCl}_3$ , 98% *ee*); IR (Neat):  $\nu_{\text{max}}$  3438, 2918, 1790, 1733, 1711, 1471, 1286, 1149, 1042, 841 and  $752$   $\text{cm}^{-1}$ ;  $^1\text{H}$  NMR ( $\text{CDCl}_3$ )  $\delta$  7.50 (1H, d,  $J = 8.0$  Hz), 7.27-7.17 (3H, m), 7.10-7.05 (3H, m), 7.00-6.93 (4H, m), 6.87 (2H, d,  $J = 7.6$  Hz), 5.68 (1H, s, *OH*), 5.29 (1H, s), 5.22 (1H, d,  $J = 15.6$  Hz), 4.17 (1H, t,  $J = 6.8$  Hz), 4.08 (2H, q,  $J = 7.2$  Hz), 2.70-2.63 (1H, m), 2.19- 2.11 (1H, m), 1.49 (9H, s), 1.23 (3H, t,  $J = 7.2$  Hz);  $^{13}\text{C}$  NMR ( $\text{CDCl}_3$ , DEPT-135)  $\delta$  174.9 (C,  $\text{N-C=O}$ ), 165.6 (C,  $\text{O-C=O}$ ), 148.0 (C,  $\text{N-CO}_2$ ), 145.0 (C), 144.7 (C), 141.5 (C), 140.4 (C), 133.8 (CH), 129.1 (CH), 128.8 (CH), 127.5 (2 x CH), 127.1 (2 x CH), 125.8 (CH), 124.2 (CH), 123.9 (C), 123.7 (C), 123.5 (CH), 122.3 (CH), 118.6 (CH), 114.7 (CH), 113.6 (CH), 84.0 (C), 82.8 (CH), 60.2 ( $\text{CH}_2$ ), 56.1 (C), 40.1 (CH), 34.5 ( $\text{CH}_2$ ), 27.9 (3 x  $\text{CH}_3$ ), 14.2 ( $\text{CH}_3$ ); HRMS  $m/z$  578.2155 ( $\text{M} + \text{Na}$ ), calcd for  $\text{C}_{33}\text{H}_{33}\text{NO}_7\text{Na}$  578.2155.

**(2*S*,3*S*,4*R*)-tert-butyl-4-((*E*)-4-ethoxy-4-oxobut-2-en-1-yl)-8-methoxy-2'-oxo-2-**

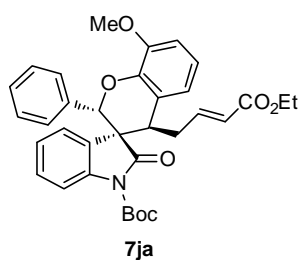

**phenylspiro[chroman-3,3'-indoline]-1'-carboxylate (7ja):**

Prepared by following the procedure **B** and purified by column chromatography using EtOAc/hexane and isolated as white gummy solid. The enantiomeric excess (*ee*) was determined by chiral stationary phase HPLC using a Daicel Chiralpak AD-H column (hexane/2-propanol = 95:5, flow rate 0.5 mL/min,  $\lambda$  = 254 nm),  $t_R$  = 14.43 min (major),  $t_R$  =

22.36 min (minor).  $[\alpha]_D^{25} = -17.09^\circ$  ( $c = 0.3$  g/100 mL,  $\text{CHCl}_3$ , 96% *ee*); IR (Neat):  $\nu_{\text{max}}$  2978, 1764, 1724, 1707, 1350, 1253, 1151, 1048, 820 and 768  $\text{cm}^{-1}$ ;  $^1\text{H}$  NMR ( $\text{CDCl}_3$ )  $\delta$  7.54 (1H, d,  $J = 8.4$  Hz), 7.21-7.12 (2H, m), 7.07 (2H, t,  $J = 7.6$  Hz), 7.02-6.91 (6H, m), 6.68 (2H, d,  $J = 7.6$  Hz), 5.84 (1H, d,  $J = 15.6$  Hz), 5.61 (1H, s), 4.16 (2H, q,  $J = 7.2$  Hz), 3.91 (3H, s,  $\text{OCH}_3$ ), 3.44 (1H, br td,  $J = 14.4, 5.2$  Hz), 3.14 (1H, t,  $J = 6.8$  Hz), 2.85 (1H, br td,  $J = 14.8, 7.6$  Hz), 1.54 (9H, s), 1.27 (3H, t,  $J = 7.2$  Hz);  $^{13}\text{C}$  NMR ( $\text{CDCl}_3$ , DEPT-135)  $\delta$  173.8 (C, N-C=O), 166.3 (C, O-C=O), 148.4 (C, N-CO<sub>2</sub>), 148.3 (C), 146.5 (CH), 143.7 (C), 138.8 (C), 135.2 (C), 128.6 (CH), 128.4 (CH), 128.0 (2 x CH), 127.7 (C), 127.5 (2 x CH), 125.1 (CH), 124.4 (CH), 123.5 (CH), 122.8 (C), 122.1 (CH), 120.8 (CH), 114.3 (CH), 110.6 (CH), 84.4 (C), 77.7 (CH), 60.2 (CH<sub>2</sub>), 56.1 (CH<sub>3</sub>,  $\text{OCH}_3$ ), 53.6 (C), 43.0 (CH), 36.3 (CH<sub>2</sub>), 28.0 (3 x CH<sub>3</sub>), 14.3 (CH<sub>3</sub>); HRMS  $m/z$  592.2312 (M+Na), calcd for  $\text{C}_{34}\text{H}_{35}\text{NO}_7\text{Na}$  592.2312.

**(2*S*,3*S*,4*R*)-tert-butyl-4-((*E*)-4-ethoxy-4-oxobut-2-en-1-yl)-6-methyl-2'-oxo-2-**

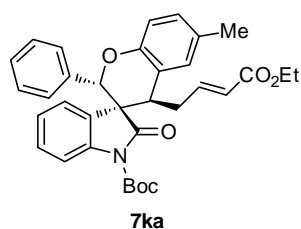

**phenylspiro[chroman-3,3'-indoline]-1'-carboxylate (7ka):**

Prepared by following the procedure **B** and purified by column chromatography using EtOAc/hexane and isolated as pale yellow viscous liquid. The enantiomeric excess (*ee*) was determined by chiral stationary phase HPLC using a Chiral Lux 5u Cellulose-2 column

(hexane/2-propanol = 98:2, flow rate 0.5 mL/min,  $\lambda$  = 254 nm),  $t_R$  = 23.19 min (major),  $t_R$  = 31.24 min (minor).  $[\alpha]_D^{25} = -22.9^\circ$  ( $c = 0.19$  g/100 mL,  $\text{CHCl}_3$ , 95% *ee*); IR (Neat):  $\nu_{\text{max}}$  2986, 2926, 1770, 1731, 1709, 1644, 1605, 1496, 1479, 1255, 1156, 1041 and 876  $\text{cm}^{-1}$ ;  $^1\text{H}$  NMR ( $\text{CDCl}_3$ )  $\delta$  7.55 (1H, d,  $J = 8.0$  Hz), 7.23-7.14 (2H, m), 7.11-7.05 (3H, m), 7.03-6.94 (5H, m), 6.87 (1H, br s), 6.75 (1H, d,  $J = 7.2$  Hz), 5.87 (1H, d,  $J = 16.0$  Hz), 5.53 (1H, s), 4.17 (2H, q,  $J = 7.2$  Hz), 3.44 (1H, dtd,  $J = 14.4, 6.0, 1.6$  Hz), 3.10 (1H, t,  $J = 6.4$  Hz), 2.86 (1H, br td,  $J = 14.8,$

7.6 Hz), 2.31 (3H, s, Ar-CH<sub>3</sub>), 1.53 (9H, s), 1.27 (3H, t, *J* = 7.2 Hz); <sup>13</sup>C NMR (CDCl<sub>3</sub>, DEPT-135) δ 173.7 (C, N-C=O), 166.2 (C, O-C=O), 151.8 (C, N-CO<sub>2</sub>), 148.4 (C), 146.6 (CH), 138.7 (C), 135.3 (C), 130.7 (CH), 130.4 (C), 129.5 (CH), 128.5 (CH), 128.4 (CH), 127.8 (2 x CH), 127.5 (2 x CH), 125.0 (CH), 124.2 (CH), 123.4 (CH), 121.5 (C), 116.6 (CH), 114.2 (CH), 114.2 (C), 84.2 (C), 77.3 (CH), 60.1 (CH<sub>2</sub>), 53.6 (C), 43.0 (CH), 36.4 (CH<sub>2</sub>), 27.9 (3 x CH<sub>3</sub>), 20.6 (CH<sub>3</sub>), 14.2 (CH<sub>3</sub>); HRMS *m/z* 576.2362 (M+Na), calcd for C<sub>34</sub>H<sub>35</sub>NO<sub>6</sub>Na 576.2362.

**(2*S*,3*S*,4*R*)-tert-butyl-4-((*E*)-4-ethoxy-4-oxobut-2-en-1-yl)-2-(4-fluorophenyl)-6-methoxy-2'-oxospiro[chroman-3,3'-indoline]-1'-carboxylate (7ge):** Prepared by following the procedure

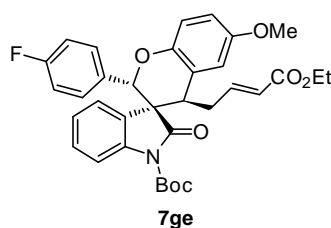

**B** and purified by column chromatography using EtOAc/hexane and isolated as pale yellow viscous liquid. The enantiomeric excess (*ee*) was determined by chiral stationary phase HPLC using a Daicel Chiralcel OD-H column (hexane/2-propanol = 98:2, flow rate 0.5 mL/min, λ = 254 nm), *t*<sub>R</sub> = 25.92 min (major), *t*<sub>R</sub> = 33.40 min (minor). [α]<sub>D</sub><sup>25</sup> = -13.6° (*c* = 0.74 g/100 mL, CHCl<sub>3</sub>, 91% *ee*); IR (Neat): ν<sub>max</sub> 2981, 1788, 1739, 1716, 1497, 1345, 1208, 1148, 839 and 749 cm<sup>-1</sup>; <sup>1</sup>H NMR (CDCl<sub>3</sub>) δ 7.55 (1H, d, *J* = 8.4 Hz), 7.22 (1H, t, *J* = 8.0 Hz), 7.06-6.84 (6H, m), 6.76 (3H, t, *J* = 8.4 Hz), 6.57 (1H, d, *J* = 2.8 Hz), 5.86 (1H, d, *J* = 15.6 Hz), 5.49 (1H, s), 4.16 (2H, q, *J* = 7.2 Hz), 3.75 (3H, s, OCH<sub>3</sub>), 3.42 (1H, br td, *J* = 14.4, 5.2 Hz), 3.09 (1H, br t, *J* = 6.8 Hz), 2.86 (1H, br td, *J* = 14.8, 8.0 Hz), 1.54 (9H, s), 1.26 (3H, t, *J* = 7.2 Hz); <sup>13</sup>C NMR (CDCl<sub>3</sub>, DEPT-135) δ 173.9 (C, N-C=O), 166.3 (C, O-C=O), 162.6 (C, d, *J* = 245.6 Hz, C-F), 153.8 (C, N-CO<sub>2</sub>), 148.3 (C), 147.8 (C), 146.5 (CH), 138.8 (C), 131.2 (C), 129.7 (2 x CH, d, *J* = 8.1 Hz), 128.8 (CH), 127.5 (C), 125.1 (CH), 124.5 (CH), 123.7 (CH), 121.6 (C), 117.7 (CH), 115.7 (CH), 114.6 (CH), 114.4 (2 x CH), 114.2 (CH), 84.6 (C), 76.7 (CH), 60.3 (CH<sub>2</sub>), 55.6 (CH<sub>3</sub>, OCH<sub>3</sub>), 53.7 (C), 43.4 (CH), 36.4 (CH<sub>2</sub>), 27.9 (3 x CH<sub>3</sub>), 14.3 (CH<sub>3</sub>); HRMS *m/z* 610.2217 (M +Na), calcd for C<sub>34</sub>H<sub>34</sub>FNO<sub>7</sub>Na 610.2217.

**(2*S*,3*S*,4*R*)-tert-butyl-2-(4-chlorophenyl)-4-((*E*)-4-ethoxy-4-oxobut-2-en-1-yl)-6-methoxy-2'-oxospiro[chroman-3,3'-indoline]-1'-carboxylate (7gf):** Prepared

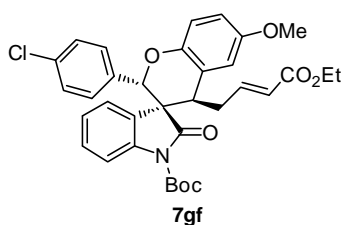

**B** and purified by column chromatography using EtOAc/hexane and isolated as pale yellow viscous liquid. The enantiomeric excess (*ee*) was determined by chiral stationary phase HPLC using a Chiral Lux 5u Cellulose-2

column (hexane/2-propanol = 90:10, flow rate 0.5 mL/min,  $\lambda = 254$  nm),  $t_R = 14.45$  min (major),  $t_R = 26.95$  min (minor).  $[\alpha]_D^{25} = -15.0^\circ$  ( $c = 1.0$  g/100 mL,  $\text{CHCl}_3$ , 94% *ee*); IR (Neat):  $\nu_{\text{max}}$  2923, 1750, 1730, 1716, 1496, 1307, 1208, 1152, 1061, 822 and 750  $\text{cm}^{-1}$ ;  $^1\text{H}$  NMR ( $\text{CDCl}_3$ )  $\delta$  7.55 (1H, d,  $J = 8.0$  Hz), 7.22 (1H, t,  $J = 8.0$  Hz), 7.06-6.87 (8H, m), 6.74 (1H, d,  $J = 7.6$  Hz), 6.57 (1H, d,  $J = 2.0$  Hz), 5.87 (1H, d,  $J = 15.6$  Hz), 5.49 (1H, s), 4.16 (2H, q,  $J = 7.2$  Hz), 3.76 (3H, s,  $\text{OCH}_3$ ), 3.42 (1H, br td,  $J = 14.4, 5.6$  Hz), 3.09 (1H, t,  $J = 5.6$  Hz), 2.85 (1H, br td,  $J = 14.4, 8.0$  Hz), 1.55 (9H, s), 1.26 (3H, t,  $J = 7.6$  Hz);  $^{13}\text{C}$  NMR ( $\text{CDCl}_3$ , DEPT-135)  $\delta$  173.8 (C, N-C=O), 166.3 (C, O-C=O), 153.8 (C, N-CO<sub>2</sub>), 148.2 (C), 147.8 (C), 146.4 (CH), 138.8 (C), 134.3 (C), 134.0 (C), 129.3 (2 x CH), 129.0 (CH), 127.8 (2 x CH), 127.4 (C), 125.0 (CH), 124.5 (CH), 123.7 (CH), 122.2 (C), 117.7 (CH), 115.7 (CH), 114.4 (CH), 114.2 (CH), 84.6 (C), 76.8 (CH), 60.2 (CH<sub>2</sub>), 55.6 (CH<sub>3</sub>), 53.7 (C), 43.4 (CH), 36.4 (CH<sub>2</sub>), 28.0 (3 x CH<sub>3</sub>), 14.2 (CH<sub>3</sub>); HRMS  $m/z$  626.1922 (M + Na), calcd for  $\text{C}_{34}\text{H}_{34}\text{ClNO}_7\text{Na}$  626.1922.

**(2*S*,3*S*,4*R*)-tert-butyl-2-(4-bromophenyl)-4-((*E*)-4-ethoxy-4-oxobut-2-en-1-yl)-6-methoxy-2'-**

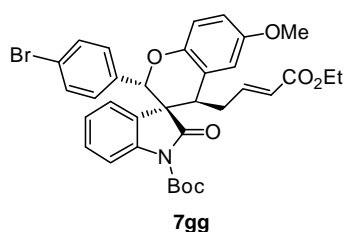

**oxospiro[chroman-3,3'-indoline]-1'-carboxylate (7gg):** Prepared by following the procedure **B** and purified by column chromatography using EtOAc/hexane and isolated as gummy solid. The enantiomeric excess (*ee*) was determined by chiral stationary phase HPLC using a Chiral Lux 5u Cellulose-2 column (hexane/2-

propanol = 90:10, flow rate 0.5 mL/min,  $\lambda = 254$  nm),  $t_R = 16.28$  min (major),  $t_R = 29.0$  min (minor).  $[\alpha]_D^{25} = -12.1^\circ$  ( $c = 1.0$  g/100 mL,  $\text{CHCl}_3$ , 94% *ee*); IR (Neat):  $\nu_{\text{max}}$  2928, 1756, 1729, 1707, 1644, 1601, 1495, 1345, 1289, 1251, 1148, 1066, 845 and 752  $\text{cm}^{-1}$ ;  $^1\text{H}$  NMR ( $\text{CDCl}_3$ )  $\delta$  7.55 (1H, d,  $J = 8.0$  Hz), 7.24-7.20 (3H, m), 7.04-6.94 (3H, m), 6.90-6.84 (3H, m), 6.74 (1H, d,  $J = 7.2$  Hz), 6.56 (1H, d,  $J = 2.8$  Hz), 5.86 (1H, d,  $J = 15.6$  Hz), 5.47 (1H, s), 4.16 (2H, q,  $J = 7.2$  Hz), 3.76 (3H, s,  $\text{OCH}_3$ ), 3.41 (1H, br td,  $J = 14.4, 5.2$  Hz), 3.09 (1H, br t,  $J = 5.6$  Hz), 2.85 (1H, td,  $J = 14.4, 8.0$  Hz), 1.55 (9H, s), 1.26 (3H, t,  $J = 7.2$  Hz);  $^{13}\text{C}$  NMR ( $\text{CDCl}_3$ , DEPT-135)  $\delta$  173.8 (C, N-C=O), 166.3 (C, O-C=O), 153.8 (C, N-CO<sub>2</sub>), 148.2 (C), 147.7 (C), 146.4 (CH), 138.8 (C), 134.5 (C), 130.7 (2 x CH), 129.6 (2 x CH), 128.9 (CH), 127.3 (C), 125.1 (CH), 124.5 (CH), 123.8 (CH), 122.7 (C), 122.2 (C), 117.8 (CH), 115.7 (CH), 114.5 (CH), 114.2 (CH), 84.7 (C), 76.7 (CH), 60.3 (CH<sub>2</sub>), 55.6 (CH<sub>3</sub>,  $\text{OCH}_3$ ), 53.6 (C), 43.4 (CH), 36.4 (CH<sub>2</sub>), 28.0 (3 x CH<sub>3</sub>), 14.3 (CH<sub>3</sub>); HRMS  $m/z$  670.1418 (M + Na), calcd for  $\text{C}_{34}\text{H}_{34}\text{BrNO}_7\text{Na}$  670.1417.



**(2*S*,3*S*,4*R*)-tert-butyl-4-((*E*)-4-ethoxy-4-oxobut-2-en-1-yl)-6-methoxy-2-(4-nitrophenyl)-2'-**

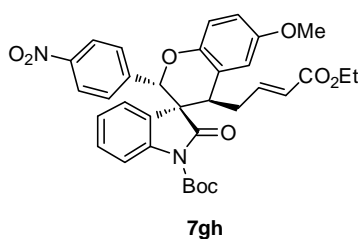

**7gh**

**oxospiro[chroman-3,3'-indoline]-1'-carboxylate (7gh):**

Prepared by following the procedure **B** and purified by column chromatography using EtOAc/hexane and isolated as pale yellow viscous liquid. The enantiomeric excess (*ee*) was determined by chiral stationary phase HPLC using a Daicel Chiralcel OD-H column (hexane/2-propanol = 98:2, flow rate 0.5 mL/min,  $\lambda = 254$  nm),  $t_R = 58.49$  min (minor),  $t_R = 67.10$  min (major).  $[\alpha]_D^{25} = -8.83^\circ$  ( $c = 1.0$  g/100 mL,  $\text{CHCl}_3$ , 96% *ee*); IR (Neat):  $\nu_{\text{max}}$  2918, 1787, 1732, 1712, 1523, 1497, 1368, 1149, 1066, 823 and 750  $\text{cm}^{-1}$ ;  $^1\text{H}$  NMR ( $\text{CDCl}_3$ )  $\delta$  7.94 (2H, d,  $J = 8.8$  Hz), 7.52 (1H, d,  $J = 8.4$  Hz), 7.26- 7.20 (3H, m), 7.03-6.89 (4H, m), 6.76 (1H, d,  $J = 7.6$  Hz), 6.57 (1H, d,  $J = 2.8$  Hz), 5.88 (1H, d,  $J = 15.2$  Hz), 5.63 (1H, s), 4.16 (2H, q,  $J = 7.2$  Hz), 3.76 (3H, s,  $\text{OCH}_3$ ), 3.41 (1H, br td,  $J = 14.8, 5.6$  Hz), 3.11 (1H, t,  $J = 5.6$  Hz), 2.86 (1H, br td,  $J = 14.8, 7.6$  Hz), 1.54 (9H, s), 1.27 (3H, t,  $J = 7.2$  Hz);  $^{13}\text{C}$  NMR ( $\text{CDCl}_3$ , DEPT-135)  $\delta$  173.6 (C, N-C=O), 166.2 (C, O-C=O), 154.1 (C, N-CO<sub>2</sub>), 148.1 (C), 147.8 (C), 147.3 (C), 146.0 (CH), 142.8 (C), 138.5 (C), 129.2 (CH), 128.9 (2 x CH), 126.8 (C), 125.1 (CH), 124.7 (CH), 123.9 (CH), 122.7 (2 x CH), 122.0 (C), 117.7 (CH), 115.9 (CH), 114.5 (CH), 114.2 (CH), 85.0 (C), 76.4 (CH), 60.3 (CH<sub>2</sub>), 55.7 (CH<sub>3</sub>,  $\text{OCH}_3$ ), 53.7 (C), 43.4 (CH), 36.3 (CH<sub>2</sub>), 27.9 (3 x CH<sub>3</sub>), 14.3 (CH<sub>3</sub>); HRMS  $m/z$  637.2160 (M + Na), calcd for C<sub>34</sub>H<sub>34</sub>N<sub>2</sub>O<sub>9</sub>Na 637.2162.

**(2*S*,3*S*,4*R*)-tert-butyl-4-((*E*)-4-ethoxy-4-oxobut-2-en-1-yl)-2-(4-(methoxycarbonyl)phenyl)-6-methyl-2'-oxospiro[chroman-3,3'-indoline]-1'-carboxylate (7ki):**

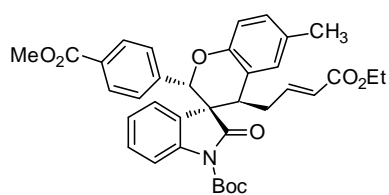

**7ki**

Prepared by following the procedure **B** and purified by column chromatography using EtOAc/hexane and isolated as pale yellow solid with M.P. 52°C. The enantiomeric excess (*ee*) was determined by chiral stationary phase HPLC using a Chiral Lux 5u Cellulose-2 column (hexane/2-propanol = 95:5, flow rate 0.5 mL/min,  $\lambda = 254$  nm),  $t_R = 30.69$  min (major),  $t_R = 41.52$  min (minor).  $[\alpha]_D^{25} = -6.32^\circ$  ( $c = 1.0$  g/100 mL,  $\text{CHCl}_3$ , 98% *ee*); IR (Neat):  $\nu_{\text{max}}$  2981, 1789, 1749, 1719, 1652, 1606, 1498, 1479, 1369, 1277, 1150, 816 and 752  $\text{cm}^{-1}$ ;  $^1\text{H}$  NMR ( $\text{CDCl}_3$ )  $\delta$  7.77 (2H, d,  $J = 7.6$  Hz), 7.53 (1H, d,  $J = 8.0$  Hz), 7.21 (1H, t,  $J = 8.0$  Hz), 7.14-7.09 (3H, m), 7.04-6.95 (3H, m), 6.88 (1H, s), 6.75 (1H, d,  $J = 7.6$  Hz), 5.88 (1H, d,  $J = 15.6$  Hz), 5.61 (1H, s), 4.18 (2H, q,  $J = 7.2$  Hz), 3.86 (3H, s,  $\text{CO}_2\text{CH}_3$ ), 3.43

(1H, br td,  $J = 14.8, 5.6$  Hz), 3.09 (1H, t,  $J = 5.6$  Hz), 2.86 (1H, br td,  $J = 14.4, 7.6$  Hz), 2.32 (3H, s, Ar-CH<sub>3</sub>), 1.54 (9H, s), 1.29 (3H, t,  $J = 7.2$  Hz); <sup>13</sup>C NMR (CDCl<sub>3</sub>, DEPT-135) δ 173.7 (C, N-C=O), 166.7 (C, O-C=O), 166.3 (C, O-C=O), 151.6 (C, N-CO<sub>2</sub>), 148.3 (C), 146.4 (CH), 140.5 (C), 138.7 (C), 130.84 (C), 130.80 (CH), 130.0 (C), 129.7 (CH), 128.8 (CH), 128.8 (2 x CH), 127.9 (2 x CH), 127.4 (C), 125.0 (CH), 124.4 (CH), 123.6 (CH), 121.5 (C), 116.6 (CH), 114.4 (CH), 84.6 (C), 77.1 (CH), 60.2 (CH<sub>2</sub>), 53.7 (C), 52.1 (CH<sub>3</sub>, OCH<sub>3</sub>), 43.1 (CH), 36.5 (CH<sub>2</sub>), 27.9 (3 x CH<sub>3</sub>), 20.7 (CH<sub>3</sub>), 14.3 (CH<sub>3</sub>); HRMS  $m/z$  634.2418 (M + Na), calcd for C<sub>36</sub>H<sub>37</sub>NO<sub>8</sub>Na 634.2417.

**(2*S*,3*S*,4*R*)-tert-butyl-4-((*E*)-4-ethoxy-4-oxobut-2-en-1-yl)-6-methoxy-2-(4-methoxyphenyl)-2'-oxospiro[chroman-3,3'-indoline]-1'-carboxylate (7gj):**

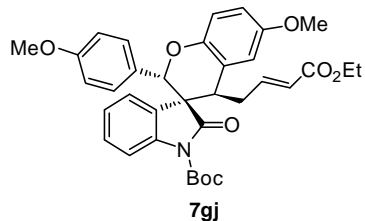

Prepared by following the procedure **B** and purified by column chromatography using EtOAc/hexane and isolated as colour less viscous liquid. The enantiomeric excess (*ee*) was determined by chiral stationary phase HPLC using a Chiral Lux 5u Cellulose-2

column (hexane/2-propanol = 95:5, flow rate 0.5 mL/min,  $\lambda = 254$  nm),  $t_R = 32.5$  min (major),  $t_R = 57.4$  min (minor).  $[\alpha]_D^{25} = -7.46^\circ$  ( $c = 0.24$  g/100 mL, CHCl<sub>3</sub>, 96% *ee*); IR (Neat):  $\nu_{\max}$  2932, 1788, 1716, 1652, 1612, 1514, 1497, 1478, 1346, 1306, 1247, 1209, 1148, 1034, 834 and 751 cm<sup>-1</sup>; <sup>1</sup>H NMR (CDCl<sub>3</sub>) δ 7.59 (1H, d,  $J = 8.0$  Hz), 7.24 (1H, dt,  $J = 6.4, 0.8$  Hz), 7.06-6.97 (3H, m), 6.91-6.89 (3H, m), 6.78 (1H, dd,  $J = 8.0, 0.8$  Hz), 6.62 (2H, td,  $J = 7.2, 1.6$  Hz), 6.58 (1H, d,  $J = 3.0$  Hz), 5.88 (1H, d,  $J = 15.5$  Hz), 5.48 (1H, s), 4.18 (2H, q,  $J = 7.5$  Hz), 3.78 (3H, s, OCH<sub>3</sub>), 3.72 (3H, s, OCH<sub>3</sub>), 3.45 (1H, br td,  $J = 14.5, 5.5$  Hz), 3.10 (1H, t,  $J = 6.5$  Hz), 2.87 (1H, br td,  $J = 15.0, 7.5$  Hz), 1.55 (9H, s), 1.28 (3H, t,  $J = 7.5$  Hz); <sup>13</sup>C NMR (CDCl<sub>3</sub>, DEPT-135) δ 173.9 (C, N-C=O), 166.3 (C, O-C=O), 159.6 (C, N-CO<sub>2</sub>), 153.7 (C), 148.5 (C), 148.2 (C), 146.6 (CH), 138.9 (CH), 129.2 (2 x CH), 128.6 (CH), 127.9 (C), 127.5 (C), 125.1 (CH), 124.3 (CH), 123.6 (CH), 122.4 (C), 117.8 (CH), 115.7 (CH), 114.4 (CH), 114.2 (C), 113.0 (2 x CH), 84.3 (C), 77.2 (CH), 60.2 (CH<sub>2</sub>), 55.7 (CH<sub>3</sub>, OCH<sub>3</sub>), 55.1 (CH<sub>3</sub>, OCH<sub>3</sub>), 53.7 (C), 43.6 (CH), 36.4 (CH<sub>2</sub>), 28.0 (3 x CH<sub>3</sub>), 14.2 (CH<sub>3</sub>); HRMS  $m/z$  622.2418 (M + Na), calcd for C<sub>35</sub>H<sub>37</sub>NO<sub>8</sub>Na 622.2417.

**(2S,3S,4R)-tert-butyl-4-((E)-4-ethoxy-4-oxobut-2-en-1-yl)-6-methoxy-2'-oxo-2-(p-**

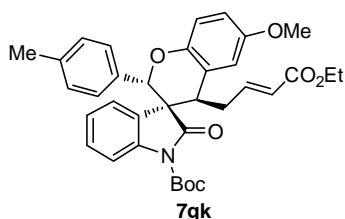

**tolyl)spiro[chroman-3,3'-indoline]-1'-carboxylate (7gk):**

Prepared by following the procedure **B** and purified by column chromatography using EtOAc/hexane and isolated as pale yellow viscous liquid. The enantiomeric excess (*ee*) was determined by chiral stationary phase HPLC using a Chiral Lux 5u Cellulose-2 column (hexane/2-propanol = 98:2, flow rate 0.5 mL/min,  $\lambda = 254$  nm),  $t_R = 23.83$  min (major),  $t_R = 58.65$  min (minor).  $[\alpha]_D^{25} = -18.2^\circ$  ( $c = 1.0$  g/100 mL,  $\text{CHCl}_3$ , 96% *ee*); IR (Neat):  $\nu_{\text{max}}$  2923, 1789, 1755, 1720, 1604, 1479, 1277, 1252, 1148, 1105, 1045, 841 and 751  $\text{cm}^{-1}$ ;  $^1\text{H}$  NMR ( $\text{CDCl}_3$ )  $\delta$  7.57 (1H, d,  $J = 8.0$  Hz), 7.22 (1H, t,  $J = 7.8$  Hz), 7.06-6.94 (3H, m), 6.89-6.83 (5H, m), 6.76 (1H, d,  $J = 7.2$  Hz), 6.57 (1H, d,  $J = 3.2$  Hz), 5.86 (1H, d,  $J = 15.6$  Hz), 5.48 (1H, s), 4.16 (2H, q,  $J = 7.2$  Hz), 3.76 (3H, s,  $\text{OCH}_3$ ), 3.44 (1H, br td,  $J = 14.4, 5.2$  Hz), 3.09 (1H, t,  $J = 6.4$  Hz), 2.85 (1H, br td,  $J = 14.4, 8.0$  Hz), 2.21 (3H, s, Ar- $\text{CH}_3$ ), 1.53 (9H, s), 1.27 (3H, t,  $J = 7.2$  Hz);  $^{13}\text{C}$  NMR ( $\text{CDCl}_3$ , DEPT-135)  $\delta$  173.8 (C, N-C=O), 166.3 (C, O-C=O), 153.7 (C, N-CO<sub>2</sub>), 148.5 (C), 148.1 (CH), 146.7 (CH), 138.9 (C), 138.1 (CH), 132.4 (CH), 128.6 (C), 128.3 (2 x CH), 127.9 (C), 127.8 (2 x CH), 125.1 (CH), 124.3 (C), 123.6 (CH), 122.4 (C), 117.8 (CH), 115.6 (CH), 114.3 (C), 114.2 (CH), 84.2 (C), 77.4 (CH), 60.2 (CH<sub>2</sub>), 55.7 (CH<sub>3</sub>, OCH<sub>3</sub>), 53.7 (C), 43.5 (CH), 36.4 (CH<sub>2</sub>), 27.9 (3 x CH<sub>3</sub>), 21.1 (CH<sub>3</sub>, Ar- $\text{CH}_3$ ), 14.2 (CH<sub>3</sub>); HRMS  $m/z$  606.2468 (M + Na), calcd for C<sub>35</sub>H<sub>37</sub>NO<sub>7</sub>Na 606.2468.

**(2S,3S,4R)-tert-butyl-4-((E)-4-ethoxy-4-oxobut-2-en-1-yl)-6-methyl-2'-oxo-2-(p-**

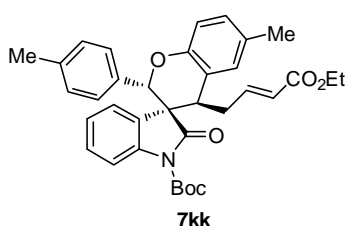

**tolyl)spiro[chroman-3,3'-indoline]-1'-carboxylate (7kk):**

Prepared by following the procedure **B** and purified by column chromatography using EtOAc/hexane and isolated as pale yellow viscous liquid. The enantiomeric excess (*ee*) was determined by chiral stationary phase HPLC using a Chiral Lux 5u Cellulose-2 column (hexane/2-propanol = 95:5, flow rate 0.5 mL/min,  $\lambda = 254$  nm),  $t_R = 12.86$  min (major),  $t_R = 17.12$  min (minor).  $[\alpha]_D^{25} = -20.7^\circ$  ( $c = 0.58$  g/100 mL,  $\text{CHCl}_3$ , 96% *ee*); IR (Neat):  $\nu_{\text{max}}$  2977, 2361, 1763, 1723, 1697, 1347, 1251, 1149, 1100, 820 and 770  $\text{cm}^{-1}$ ;  $^1\text{H}$  NMR ( $\text{CDCl}_3$ )  $\delta$  7.57 (1H, d,  $J = 8.0$  Hz), 7.21 (1H, t,  $J = 8.0$  Hz), 7.09 (1H, d,  $J = 8.4$  Hz), 7.02-6.93 (3H, m), 6.90-6.84 (5H, m), 6.74 (1H, d,  $J = 7.6$  Hz), 5.85 (1H, d,  $J = 15.6$  Hz), 5.48 (1H, s), 4.17 (2H, q,

$J = 7.2$  Hz), 3.43 (1H, br td,  $J = 14.8, 5.6$  Hz), 3.07 (1H, t,  $J = 6.4$  Hz), 2.84 (1H, br td,  $J = 14.8, 7.6$  Hz), 2.30 (3H, s, Ar-CH<sub>3</sub>), 2.22 (3H, s, Ar-CH<sub>3</sub>), 1.53 (9H, s), 1.27 (3H, t,  $J = 7.2$  Hz); <sup>13</sup>C NMR (CDCl<sub>3</sub>, DEPT-135)  $\delta$  173.8 (C, N-C=O), 166.4 (C, O-C=O), 152.0 (C, N-CO<sub>2</sub>), 148.5 (C), 146.8 (CH), 138.9 (C), 138.1 (C), 132.4 (C), 130.8 (CH), 130.5 (C), 129.5 (CH), 128.6 (CH), 128.3 (2 x CH), 128.0 (C), 127.8 (2 x CH), 125.1 (CH), 124.3 (CH), 123.4 (CH), 121.7 (C), 116.7 (CH), 114.3 (CH), 84.2 (C), 77.3 (CH), 60.2 (CH<sub>2</sub>), 53.7 (C), 43.2 (CH), 36.6 (CH<sub>2</sub>), 27.9 (3 x CH<sub>3</sub>), 21.1 (CH<sub>3</sub>), 20.7 (CH<sub>3</sub>), 14.3 (CH<sub>3</sub>); HRMS  $m/z$  590.2517 (M + Na), calcd for C<sub>35</sub>H<sub>37</sub>NO<sub>6</sub>Na 590.2519.

**(2S,3S,4R)-tert-butyl-4-((E)-4-ethoxy-4-oxobut-2-en-1-yl)-6-methoxy-2'-oxo-2-**

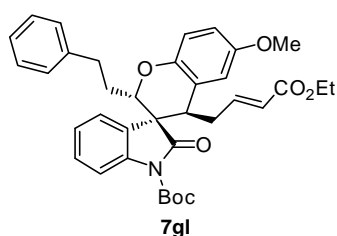

**phenethylspiro[chroman-3,3'-indoline]-1'-carboxylate (7gl):**

Prepared by following the procedure **B** and purified by column chromatography using EtOAc/hexane and isolated as pale colourless liquid. The enantiomeric excess (*ee*) was determined by chiral stationary phase HPLC using a Daicel Chiralcel OD-H column (hexane/2-propanol = 98:2, flow rate 0.5 mL/min,  $\lambda = 254$  nm),  $t_R = 15.52$  min (major),  $t_R = 19.18$  min (minor).  $[\alpha]_D^{25} = -13.6^\circ$  ( $c = 0.42$  g/100 mL, CHCl<sub>3</sub>, 98% *ee*); IR (Neat):  $\nu_{\max}$  2922, 1789, 1736, 1711, 1676, 1616, 1596, 1456, 1304, 1245, 1177, 1149, 1001 and 751 cm<sup>-1</sup>; <sup>1</sup>H NMR (CDCl<sub>3</sub>)  $\delta$  7.81 (1H, d,  $J = 8.4$  Hz), 7.27-7.23 (3H, m), 7.17-7.14 (3H, m), 6.99-6.85 (4H, m), 6.68 (1H, d,  $J = 7.2$  Hz), 6.46 (1H, d,  $J = 2.8$  Hz), 5.78 (1H, d,  $J = 15.6$  Hz), 4.49 (1H, dd,  $J = 10.4, 1.6$  Hz), 4.16 (2H, q,  $J = 7.2$  Hz), 3.73 (3H, s, OCH<sub>3</sub>), 3.19 (1H, br td,  $J = 14.4, 5.6$  Hz), 3.05-2.98 (1H, m), 2.89 (1H, t,  $J = 6.8$  Hz), 2.76-2.68 (1H, m), 2.63 (1H, br td,  $J = 14.8, 7.6$  Hz), 1.71-1.56 (1H, m), 1.66 (9H, s), 1.52-1.36 (1H, m), 1.26 (3H, t,  $J = 7.2$  Hz); <sup>13</sup>C NMR (CDCl<sub>3</sub>, DEPT-135)  $\delta$  174.7 (C, N-C=O), 166.2 (C, O-C=O), 153.5 (C, N-CO<sub>2</sub>), 148.8 (C), 147.5 (C), 146.6 (CH), 141.4 (C), 138.8 (C), 128.6 (3 x CH), 128.4 (C), 128.4 (2 x CH), 125.9 (CH), 124.8 (CH), 124.7 (CH), 123.4 (CH), 122.3 (C), 117.5 (CH), 115.5 (CH), 114.6 (CH), 114.2 (CH), 84.8 (C), 74.4 (CH), 60.2 (CH<sub>2</sub>), 55.6 (CH<sub>3</sub>, OCH<sub>3</sub>), 52.1 (C), 43.8 (CH), 36.4 (CH<sub>2</sub>), 33.1 (CH<sub>2</sub>), 32.1 (CH<sub>2</sub>), 28.1 (3 x CH<sub>3</sub>), 14.3 (CH<sub>3</sub>); HRMS  $m/z$  620.2628 (M + Na), calcd for C<sub>36</sub>H<sub>39</sub>NO<sub>7</sub>Na 620.2625.

**(2S,3S,4R)-tert-butyl-4-((E)-4-ethoxy-4-oxobut-2-en-1-yl)-6-methoxy-2'-oxo-2-**

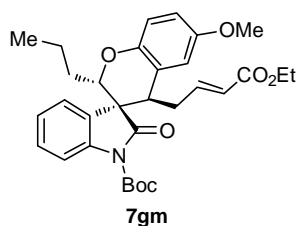

**propylspiro[chroman-3,3'-indoline]-1'-carboxylate (7gm):**

Prepared by following the procedure **B** and purified by column chromatography using EtOAc/hexane and isolated as colour less viscous liquid. The enantiomeric excess (*ee*) was determined by chiral stationary phase HPLC using a Lux 5u Amylose-2 column (hexane/2-propanol = 99.4:0.6, flow rate 1.0 mL/min,  $\lambda = 220$  nm),  $t_R = 21.6$  min (minor),  $t_R = 25.3$  min (major).  $[\alpha]_D^{25} = -36.2^\circ$  ( $c = 0.70$  g/100 mL,  $\text{CHCl}_3$ , 94% *ee*); IR (Neat):  $\nu_{\text{max}}$  2955, 1789, 1752, 1721, 1652, 1498, 1346, 1212, 1148, 1039 and 751  $\text{cm}^{-1}$ ;  $^1\text{H}$  NMR ( $\text{CDCl}_3$ )  $\delta$  7.84 (1H, d,  $J = 8.0$  Hz), 7.27 (1H, t,  $J = 6.8$  Hz), 6.95-6.88 (3H, m), 6.84-6.81 (1H, m), 6.64 (1H, d,  $J = 7.2$  Hz), 6.45 (1H, d,  $J = 2.8$  Hz), 5.77 (1H, d,  $J = 15.6$  Hz), 4.43 (1H, dd,  $J = 10.4, 1.6$  Hz), 4.14 (2H, q,  $J = 7.2$  Hz), 3.71 (3H, s,  $\text{OCH}_3$ ), 3.19 (1H, br td,  $J = 14.8, 5.6$  Hz), 2.88 (1H, t,  $J = 6.4$  Hz), 2.64 (1H, br td,  $J = 14.4, 8.0$  Hz), 1.72-1.66 (1H, m), 1.66 (9H, s), 1.53-1.37 (1H, m), 1.25 (3H, t,  $J = 7.2$  Hz), 1.27-1.18 (1H, m), 1.15-1.03 (1H, m), 0.85 (3H, t,  $J = 7.2$  Hz);  $^{13}\text{C}$  NMR ( $\text{CDCl}_3$ , DEPT-135)  $\delta$  174.8 (C, N-C=O), 166.2 (C, O-C=O), 153.4 (C, N-CO<sub>2</sub>), 149.0 (C), 147.6 (C), 146.6 (CH), 138.8 (C), 128.6 (C), 128.5 (CH), 124.8 (CH), 124.6 (CH), 123.3 (CH), 122.3 (C), 117.4 (CH), 115.4 (CH), 114.5 (CH), 114.2 (CH), 84.7 (C), 74.7 (CH), 60.2 (CH<sub>2</sub>), 55.6 (CH<sub>3</sub>, OCH<sub>3</sub>), 52.2 (C), 43.8 (CH), 36.4 (CH<sub>2</sub>), 33.1 (CH<sub>2</sub>), 28.1 (3 x CH<sub>3</sub>), 19.0 (CH<sub>2</sub>), 14.2 (CH<sub>3</sub>), 13.7 (CH<sub>3</sub>); HRMS  $m/z$  536.2647 (M + H), calcd for C<sub>31</sub>H<sub>37</sub>NO<sub>7</sub>H 536.2648.

**(2S,3S,4R)-tert-butyl-2-butyl-4-((E)-4-ethoxy-4-oxobut-2-en-1-yl)-6-methoxy-2'-**

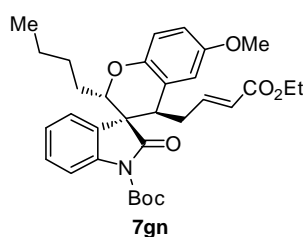

**oxospiro[chroman-3,3'-indoline]-1'-carboxylate (7gn):**

Prepared by following the procedure **B** and purified by column chromatography using EtOAc/hexane and isolated as colour less viscous liquid. The enantiomeric excess (*ee*) was determined by chiral stationary phase HPLC using a Lux 5u Amylose-2 column (hexane/2-propanol = 98.5:1.5, flow rate 0.5 mL/min,  $\lambda = 254$  nm),  $t_R = 22.2$  min (minor),  $t_R = 23.3$  min (major).  $[\alpha]_D^{25} = -46.6^\circ$  ( $c = 1.0$  g/100 mL,  $\text{CHCl}_3$ , 96% *ee*); IR (Neat):  $\nu_{\text{max}}$  2955, 1790, 1749, 1721, 1652, 1498, 1346, 1212, 1148, 1039 and 752  $\text{cm}^{-1}$ ;  $^1\text{H}$  NMR ( $\text{CDCl}_3$ )  $\delta$  7.84 (1H, d,  $J = 8.4$  Hz), 7.26 (1H, br t,  $J = 6.4$  Hz), 6.95-6.87 (3H, m), 6.84-6.81 (1H, m), 6.64 (1H, d,  $J = 7.6$  Hz), 6.45 (1H, d,  $J = 2.8$  Hz), 5.77 (1H, d,  $J = 15.6$  Hz), 4.42 (1H, dd,  $J = 10., 0.8$  Hz), 4.14 (2H, q,  $J = 7.2$  Hz),

3.71 (3H, s, OCH<sub>3</sub>), 3.19 (1H, br td, *J* = 14.8, 6.0 Hz), 2.88 (1H, t, *J* = 6.4 Hz), 2.63 (1H, br td, *J* = 14.8, 8.0 Hz), 1.66 (9H, s), 1.62-1.54 (1H, m), 1.43-1.35 (1H, m), 1.30-1.20 (3H, m), 1.25 (3H, t, *J* = 7.2 Hz), 1.15-1.06 (1H, m), 0.84 (3H, t, *J* = 7.6 Hz); <sup>13</sup>C NMR (CDCl<sub>3</sub>, DEPT-135) δ 174.8 (C, N-C=O), 166.2 (C, O-C=O), 153.4 (C, N-CO<sub>2</sub>), 149.0 (C), 147.6 (C), 146.6 (CH), 138.8 (C), 128.6 (C), 128.5 (CH), 124.8 (CH), 124.6 (CH), 123.3 (CH), 122.3 (C), 117.4 (CH), 115.4 (CH), 114.4 (CH), 114.2 (CH), 84.7 (C), 74.9 (CH), 60.2 (CH<sub>2</sub>), 55.6 (CH<sub>3</sub>, OCH<sub>3</sub>), 52.3 (C), 43.8 (CH), 36.4 (CH<sub>2</sub>), 30.9 (CH<sub>2</sub>), 28.1 (3 x CH<sub>3</sub>), 28.0 (CH<sub>2</sub>), 22.3 (CH<sub>2</sub>), 14.2 (CH<sub>3</sub>), 14.0 (CH<sub>3</sub>); HRMS *m/z* 572.2625 (M + Na), calcd for C<sub>32</sub>H<sub>39</sub>NO<sub>7</sub>Na 572.2625.

**(2*R*,3*S*,4*R*)-1'-*tert*-butyl-2-ethyl-4-((*E*)-4-ethoxy-4-oxobut-2-en-1-yl)-2'-oxospiro[chroman-**

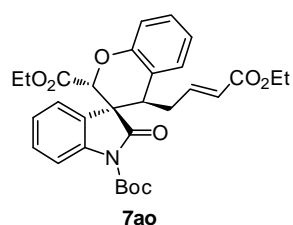

**7ao**

**3,3'-indoline]-1',2-dicarboxylate (7ao):** Prepared by following the procedure **B** and purified by column chromatography using EtOAc/hexane and isolated as colour less viscous liquid. The enantiomeric excess (*ee*) was determined by chiral stationary phase HPLC using a Daicel Chiralpak AD-H column (hexane/2-propanol =

95:5, flow rate 1.0 mL/min, λ = 254 nm), *t<sub>R</sub>* = 8.35 min (minor), *t<sub>R</sub>* = 11.16 min (major). [α]<sub>D</sub><sup>25</sup> = -33.96° (*c* = 0.83 g/100 mL, CHCl<sub>3</sub>, 94% *ee*); IR (Neat): ν<sub>max</sub> 2922, 2852, 1790, 1736, 1711, 1676, 1616, 1596, 1456, 1304, 1248, 1177, 1149, 1086, 1001 and 751 cm<sup>-1</sup>; <sup>1</sup>H NMR (CDCl<sub>3</sub>) δ 7.82 (1H, d, *J* = 8.0 Hz), 7.34-7.17 (3H, m), 6.95 (1H, t, *J* = 7.6 Hz), 6.89-6.80 (3H, m), 6.70 (1H, d, *J* = 7.2 Hz), 5.74 (1H, d, *J* = 15.6 Hz), 5.31 (1H, s), 4.13 (2H, q, *J* = 7.2 Hz), 3.85 (2H, m), 3.21-3.13 (1H, m), 2.92 (1H, dd, *J* = 8.8, 4.4 Hz), 2.61 (1H, br td, *J* = 14.4, 8.4 Hz), 1.68 (9H, s), 1.24 (3H, t, *J* = 7.2 Hz), 0.89 (3H, t, *J* = 7.2 Hz); <sup>13</sup>C NMR (CDCl<sub>3</sub>, DEPT-135) δ 173.4 (C, N-C=O), 167.5 (C, O-C=O), 165.7 (C, O-C=O), 153.0 (C, N-CO<sub>2</sub>), 149.0 (C), 145.3 (CH), 139.0 (C), 130.0 (CH), 129.2 (CH), 129.0 (CH), 128.0 (C), 124.3 (CH), 124.2 (CH), 123.9 (CH), 122.2 (C), 121.8 (CH), 117.3 (CH), 114.5 (CH), 84.8 (C), 75.8 (CH), 61.6 (CH<sub>2</sub>), 60.2 (CH<sub>2</sub>), 51.4 (C), 43.6 (CH), 34.2 (CH<sub>2</sub>), 28.1 (3 x CH<sub>3</sub>), 14.2 (CH<sub>3</sub>), 13.4 (CH<sub>3</sub>); HRMS *m/z* 558.2104 (M + Na), calcd for C<sub>30</sub>H<sub>33</sub>NO<sub>8</sub>Na 558.2104.

**(2R,3S,4R)-1'-tert-butyl-2-ethyl-4-((E)-4-ethoxy-4-oxobut-2-en-1-yl)-5'-fluoro-6-methyl-2'-oxospiro[chroman-3,3'-indoline]-1',2-dicarboxylate (7kp):** Prepared by following the

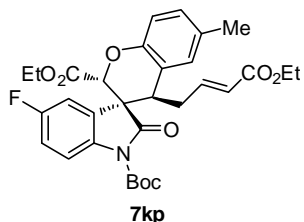

procedure **B** and purified by column chromatography using EtOAc/hexane and isolated as pale yellow viscous liquid. The enantiomeric excess (*ee*) was determined by chiral stationary phase HPLC using a Daicel Chiralpak AD-H column (hexane/2-propanol = 97:3, flow rate 1.0 mL/min,  $\lambda = 254$  nm),  $t_R = 17.4$  min (major),  $t_R =$

28.8 min (minor).  $[\alpha]_D^{25} = -18.8^\circ$  ( $c = 0.36$  g/100 mL,  $\text{CHCl}_3$ , 92% *ee*); IR (Neat):  $\nu_{\text{max}}$  2978, 1790, 1762, 1729, 1480, 1247, 1147, 1090, 817 and 734  $\text{cm}^{-1}$ ;  $^1\text{H}$  NMR ( $\text{CDCl}_3$ )  $\delta$  7.84 (1H, dd,  $J = 9.2, 4.8$  Hz), 7.11-7.06 (3H, m), 6.99 (1H, dt,  $J = 8.8, 2.8$  Hz), 6.71-6.64 (1H, m), 6.60 (1H, dd,  $J = 8.0, 2.8$  Hz), 5.36 (1H, d,  $J = 15.6$  Hz), 4.92 (1H, s), 4.10 (2H, q,  $J = 7.2$  Hz), 4.04-3.97 (2H, m), 3.92 (1H, t,  $J = 6.4$  Hz), 2.48 (1H, br td,  $J = 16.0, 6.4$  Hz), 2.31 (3H, s, Ar- $\text{CH}_3$ ), 2.25 (1H, br td,  $J = 16.4, 1.8$  Hz), 1.65 (9H, s), 1.24 (3H, t,  $J = 7.2$  Hz), 1.03 (3H, t,  $J = 7.2$  Hz);  $^{13}\text{C}$  NMR ( $\text{CDCl}_3$ , DEPT-135)  $\delta$  174.5 (C, N-C=O), 166.3 (C, O-C=O), 165.6 (C, O-C=O), 159.6 (C, d,  $J = 243$  Hz, C-F), 150.3 (C, N-CO<sub>2</sub>), 148.7 (C), 144.3 (CH), 136.4 (C), 132.1 (C), 129.5 (CH), 127.5 (CH), 126.0 (C, d,  $J = 9.0$  Hz), 122.8 (CH), 121.6 (C), 117.3 (CH), 116.1 (CH, d,  $J = 5.0$  Hz), 116.0 (CH, d,  $J = 19$  Hz), 113.3 (CH, d,  $J = 24$  Hz), 84.9 (C), 78.2 (CH), 61.9 (CH<sub>2</sub>), 60.2 (CH<sub>2</sub>), 52.1 (C), 41.4 (CH), 32.9 (CH<sub>2</sub>), 28.1 (3 x CH<sub>3</sub>), 20.1 (CH<sub>3</sub>), 14.2 (CH<sub>3</sub>), 13.6 (CH<sub>3</sub>); HRMS  $m/z$  568.2348 (M + H), calcd for C<sub>31</sub>H<sub>34</sub>FNO<sub>8</sub>H 568.2346.

**(2S,3S,4R)-tert-butyl-4-(3,3-dicyanopropyl)-2'-oxo-2-phenylspiro[chroman-3,3'-indoline]-**

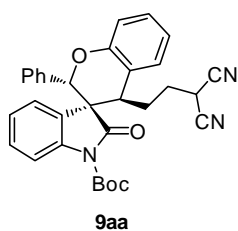

**1'-carboxylate (9aa):** Prepared by following the procedure **C** and purified by column chromatography using EtOAc/hexane and isolated as pale brown solid with M.P 69°C. The enantiomeric excess (*ee*) was determined by chiral stationary phase HPLC using a Daicel Chiralcel OD-H column (hexane/2-propanol = 95:5, flow rate 0.6 mL/min,  $\lambda = 254$  nm),  $t_R = 28.45$

min (major),  $t_R = 33.63$  min (minor).  $[\alpha]_D^{25} = +1.45^\circ$  ( $c = 0.41$  g/100 mL,  $\text{CHCl}_3$ , 98% *ee*); IR (Neat):  $\nu_{\text{max}}$  2926, 2252, 1784, 1744, 1607, 1484, 1313, 1252, 1151, 840 and 755  $\text{cm}^{-1}$ ;  $^1\text{H}$  NMR ( $\text{CDCl}_3$ )  $\delta$  7.53 (1H, d,  $J = 8.4$  Hz), 7.36 (1H, t,  $J = 7.2$  Hz), 7.24-7.06 (7H, m), 6.99- 6.95 (3H, m), 6.70 (1H, d,  $J = 7.6$  Hz), 5.50 (1H, s), 3.81 (1H, t,  $J = 7.6$  Hz), 3.04 (1H, t,  $J = 5.6$  Hz), 2.81-2.74 (1H, m), 2.44-2.35 (1H, m), 2.29-2.20 (1H, m), 2.10-2.02 (1H, m), 1.54 (9H, s);  $^{13}\text{C}$  NMR

(CDCl<sub>3</sub>, DEPT-135)  $\delta$  174.1 (C, N-C=O), 154.1 (C, N-CO<sub>2</sub>), 148.2 (C), 138.7 (C), 134.9 (C), 130.0 (CH), 129.2 (CH), 128.9 (CH), 128.7 (CH), 127.8 (2 x CH), 127.7 (C), 127.6 (2 x CH), 124.9 (CH), 124.5 (CH), 122.0 (CH), 121.8 (C), 117.4 (CH), 114.3 (CH), 112.4 (2 x C, CN), 84.7 (C), 77.8 (CH), 53.7 (C), 43.1 (CH), 31.4 (CH<sub>2</sub>), 29.9 (CH<sub>2</sub>), 28.0 (3 x CH<sub>3</sub>), 22.7 (CH); HRMS *m/z* 542.2058 (M+Na), calcd for C<sub>32</sub>H<sub>29</sub>N<sub>3</sub>O<sub>4</sub>Na 542.2056.

**(2*S*,3*S*,4*R*)-tert-butyl-4-(2,2-dimethoxyethyl)-2'-oxo-2-phenylspiro[chroman-3,3'-indoline]-**

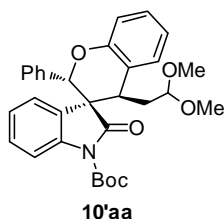

**1'-carboxylate (10'aa):** Prepared by following the procedure **D** and purified by column chromatography using EtOAc/hexane and isolated as colour less viscous liquid;  $[\alpha]_D^{25} = +18.1^\circ$  (*c* = 0.71 g/100 mL, CHCl<sub>3</sub>, 99% *ee*); IR (Neat):  $\nu_{\max}$  2980, 1786, 1731, 1483, 1249, 1150, 1056, 909 and 728 cm<sup>-1</sup>; <sup>1</sup>H NMR (CDCl<sub>3</sub>)  $\delta$  7.56 (1H, d, *J* = 8.0 Hz), 7.32-7.28 (1H, m), 7.21-

7.14 (3H, m), 7.11-6.90 (7H, m), 6.64 (1H, d, *J* = 8.0 Hz), 5.61 (1H, s), 4.43 (1H, t, *J* = 6.0 Hz), 3.36 (3H, s, OCH<sub>3</sub>), 3.34 (3H, s, OCH<sub>3</sub>), 3.17-3.10 (2H, m), 2.04-1.96 (1H, m), 1.54 (9H, s); <sup>13</sup>C NMR (CDCl<sub>3</sub>, DEPT-135)  $\delta$  173.9 (C, N-C=O), 154.0 (C, N-CO<sub>2</sub>), 148.6 (C), 138.8 (C), 135.6 (C), 130.7 (CH), 128.5 (2 x CH), 128.4 (CH), 128.1 (C), 128.0 (2 x CH), 127.6 (2 x CH), 125.1 (CH), 124.1 (CH), 123.6 (C), 121.4 (CH), 116.8 (CH), 114.2 (CH), 103.0 (CH, CH(OCH<sub>3</sub>)<sub>2</sub>), 84.2 (C), 77.4 (CH), 53.5 (CH<sub>3</sub>, OCH<sub>3</sub>), 53.3 (C), 52.7 (CH<sub>3</sub>, OCH<sub>3</sub>), 39.8 (CH), 36.4 (CH<sub>2</sub>), 28.0 (3 x CH<sub>3</sub>); HRMS *m/z* 538.2207 (M+Na), calcd for C<sub>31</sub>H<sub>33</sub>NO<sub>6</sub>Na 538.2206.

**(2*S*,3*R*,4*S*)-tert-butyl-4-(2,2-dimethoxyethyl)-2-phenylspiro[chroman-3,3'-indoline]-1'-**

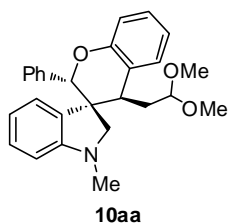

**carboxylate (10aa):** Prepared by following the procedure **D** and purified by column chromatography using EtOAc/hexane and isolated as pale yellow gummy solid.  $[\alpha]_D^{25} = -23.85^\circ$  (*c* = 0.21 g/100 mL, CHCl<sub>3</sub>, 99% *ee*); IR (Neat):  $\nu_{\max}$  3035, 2934, 1605, 1584, 1487, 1454, 1233, 1123, 1053, and 751 cm<sup>-1</sup>; <sup>1</sup>H NMR (C<sub>6</sub>D<sub>6</sub>)  $\delta$  7.41 (1H, d, *J* = 7.5 Hz), 7.15-7.10 (1H, m),

7.02-6.89 (8H, m), 6.69 (1H, d, *J* = 7.5 Hz), 6.48 (1H, t, *J* = 7.5 Hz), 6.03 (1H, d, *J* = 8.0 Hz), 5.16 (1H, s), 4.59 (1H, dd, *J* = 8.0, 3.5 Hz), 3.33 (1H, dd, *J* = 9.5, 2.5 Hz), 3.10 (3H, s, OCH<sub>3</sub>), 3.06 (3H, s, OCH<sub>3</sub>), 3.06 (1H, d, *J* = 9.5 Hz), 2.98 (1H, d, *J* = 9.0 Hz), 2.02 (3H, s, NCH<sub>3</sub>), 2.01 (1H, ddd, *J* = 12.5, 10.5, 3.0 Hz), 1.87 (1H, ddd, *J* = 14.0, 10.0, 4.0 Hz); <sup>13</sup>C NMR (C<sub>6</sub>D<sub>6</sub>, DEPT-135)  $\delta$  155.4 (C), 153.9 (C), 138.4 (C), 130.4 (C), 130.4 (CH), 129.0 (CH), 128.6 (CH), 128.3 (2 x CH), 128.0 (CH), 127.3 (2 x CH), 126.0 (CH), 125.6 (C), 120.7 (CH), 117.6 (CH), 117.0 (CH),



106.9 (CH), 103.3 (CH, CH(OCH<sub>3</sub>)<sub>2</sub>), 80.3 (CH), 62.5 (CH<sub>2</sub>), 53.6 (CH<sub>3</sub>, OCH<sub>3</sub>), 51.6 (CH<sub>3</sub>, OCH<sub>3</sub>), 49.6 (C), 39.3 (CH), 37.2 (CH<sub>2</sub>), 34.5 (CH<sub>3</sub>, NCH<sub>3</sub>); HRMS m/z 416.2225 (M+H), calcd for C<sub>27</sub>H<sub>29</sub>NO<sub>3</sub>H 416.2225.

**In situ formation and detection of aiminal intermediate (C<sub>1</sub>):** Experiment performed in NMR

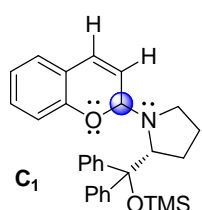

tube with the each 0.05 mmol of **1a** and (*R*)-**3** in CDCl<sub>3</sub> (0.4 mL) at room temperature, within 10 min crude compound NMR recorded in 500 MHz NMR machine. Analysis of crude compound NMR revealed that intermediate **C<sub>1</sub>** is formed almost as single compound along with starting material. IR (Neat):  $\nu_{\max}$  3058, 2954, 1665, 1585, 1487, 1447, 1250, 1069, 839 and 703 cm<sup>-1</sup>; <sup>1</sup>H NMR (CDCl<sub>3</sub>, 500 MHz)  $\delta$  7.56 (2H, d, *J* = 7.0 Hz), 7.50 (2H, d, *J* = 6.5 Hz), 7.37-7.28 (6H, m), 7.12 (1H, dt, *J* = 8.0, 1.5 Hz), 6.97 (1H, dd, *J* = 7.5, 1.5 Hz), 6.87-6.79 (2H, m), 6.48 (1H, d, *J* = 10.0 Hz, olefinic-*H*), 5.92 (1H, br s, O-CH-N), 5.58 (1H, dd, *J* = 10.0, 3.0 Hz, olefinic-*H*), 4.66 (1H, dd, *J* = 9.0, 4.0 Hz, N-CH), 2.66 (1H, q, *J* = 7.5 Hz), 2.37-2.31 (1H, m), 2.10-2.06 (1H, m), 1.80-1.75 (1H, m), 1.30-1.24 (1H, m), 0.70-0.66 (1H, m), -0.14 (9H, s, 3 x CH<sub>3</sub>); <sup>13</sup>C NMR (CDCl<sub>3</sub>, 125 MHz, DEPT-135)  $\delta$  155.2 (C), 143.9 (C), 143.6 (C), 129.8 (2 x CH), 129.6 (2 x CH), 129.1 (CH), 127.3 (2 x CH), 127.2 (CH), 127.0 (CH), 126.9 (2 x CH), 126.6 (CH), 125.1 (CH), 122.8 (CH), 120.4 (C), 119.7 (CH), 115.0 (CH), 89.0 (CH, O-CH-N), 84.8 (C), 67.1 (CH, N-CH), 46.0 (CH<sub>2</sub>), 29.6 (CH<sub>2</sub>), 24.7 (CH<sub>2</sub>), 1.9 (3 x CH<sub>3</sub>); HRMS m/z 456.2359 (M + H), calcd for C<sub>29</sub>H<sub>34</sub>NO<sub>2</sub>Si 456.2359.

**In situ formation and detection of *o*-quinone methide and aiminal intermediates (B<sub>2</sub> and C<sub>2</sub>):** Experiment performed in NMR tube with **1e** and (*R*)-**3** (each 0.1 mmol) in CDCl<sub>3</sub> (0.4 mL)

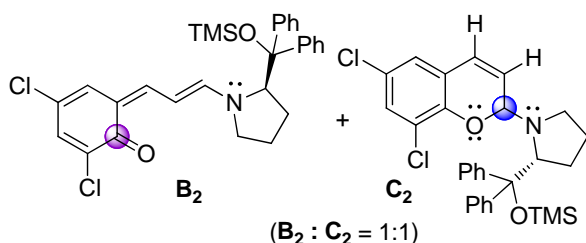

at room temperature, within 10-20 min crude compound NMR was recorded in 400 MHz NMR machine. Analysis of crude compound NMR revealed that intermediates **B<sub>2</sub>** and **C<sub>2</sub>** are there in almost 1:1 ratio. IR (Neat):  $\nu_{\max}$  3060, 2953, 1588, 1491, 1457, 1250, 1068, 875, 839 and 703 cm<sup>-1</sup>; **Intermediate B<sub>2</sub>**: <sup>1</sup>H NMR (CDCl<sub>3</sub>, 400 MHz)  $\delta$  7.85 (1H, d, *J* = 11.2 Hz), 7.40-7.33 (5H, m), 7.26-7.23 (6H, m), 7.16 (1H, d, *J* = 2.4 Hz), 6.97 (1H, s), 6.84 (1H, d, *J* = 2.0 Hz), 4.68 (1H, br d, *J* = 4.8 Hz), 3.39-3.34 (1H, m),

2.44-2.39 (1H, m), 2.38-2.33 (1H, m), 2.13-2.07 (1H, m), 1.70-1.66 (1H, m), 1.09-1.04 (1H, m), -0.17 (9H, s, 3 x CH<sub>3</sub>); <sup>13</sup>C NMR (CDCl<sub>3</sub>, 100 MHz, DEPT-135) δ 171.9 (C, C=O), 160.0 (CH), 149.4 (C), 143.9 (C), 139.9 (C), 134.0 (CH), 129.5 (CH), 128.8 (3 x CH), 128.76 (2 x CH), 128.67 (2 x CH), 128.5 (CH), 128.0 (2 x CH), 127.7 (CH), 124.4 (CH), 123.0 (C), 122.6 (C), 83.6 (C, TMSO-C), 73.6 (CH, N-CH), 50.4 (CH<sub>2</sub>), 26.8 (CH<sub>2</sub>), 22.4 (CH<sub>2</sub>), 1.6 (3 x CH<sub>3</sub>).

**Intermediate C<sub>2</sub>**: <sup>1</sup>H NMR (CDCl<sub>3</sub>, 400 MHz) δ 7.50 (2H, d, *J* = 7.2 Hz), 7.46 (2H, d, *J* = 8.0 Hz), 7.34-7.32 (4H, m), 7.30-7.28 (4H, m), 6.38 (1H, d, *J* = 10.0 Hz, olefinic-*H*), 6.00 (1H, br s, O-CH-N), 5.63 (1H, br d, *J* = 8.4 Hz, olefinic-*H*), 4.75 (1H, d, *J* = 8.0 Hz), 2.47-2.45 (1H, m), 2.30-2.27 (1H, m), 2.05-1.97 (1H, m), 1.78-1.75 (1H, m), 1.30-1.20 (1H, m), 0.71 (1H, br s), -0.19 (9H, s, 3 x CH<sub>3</sub>); <sup>13</sup>C NMR (CDCl<sub>3</sub>, 100 MHz, DEPT-135) δ 164.4 (C), 143.4 (C), 140.8 (C), 129.7 (2 x CH), 129.5 (2 x CH), 129.2 (CH), 127.4 (2 x CH), 127.3 (CH), 127.1 (CH), 127.0 (2 x CH), 124.7 (CH), 124.0 (CH), 123.9 (2 x C), 120.6 (CH), 114.6 (C), 90.3 (CH, br s, O-CH-N), 84.7 (C, TMSO-C), 67.1 (CH, N-CH), 46.1 (CH<sub>2</sub>), 29.4 (CH<sub>2</sub>), 24.5 (CH<sub>2</sub>), 1.9 (3 x CH<sub>3</sub>); HRMS *m/z* 524.1579 (M + H), calcd for C<sub>29</sub>H<sub>32</sub>Cl<sub>2</sub>NO<sub>2</sub>Si 524.1579.

**In situ formation and detection of *o*-quinone methide and amination intermediates (B<sub>3</sub> and C<sub>3</sub>):**

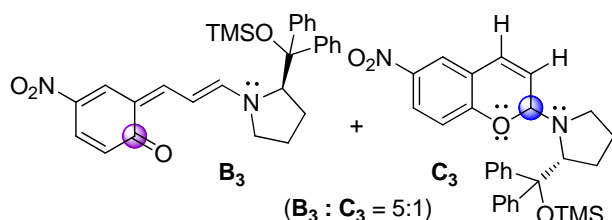

Experiment performed in NMR tube with **1f** and (*R*)-**3** (each 0.1 mmol) in CDCl<sub>3</sub> (0.4 mL) at room temperature, within 10-20 min crude compound NMR was recorded in 500 MHz NMR machine. Analysis of crude

compound NMR revealed that intermediates B<sub>3</sub> and C<sub>3</sub> are there in almost 5:1 ratio.

**Intermediate B<sub>3</sub>**: <sup>1</sup>H NMR (CDCl<sub>3</sub>, 500 MHz) δ 8.20 (1H, d, *J* = 3.0 Hz), 8.11 (1H, d, *J* = 11.0 Hz), 7.93 (1H, dd, *J* = 10.0, 3.0 Hz), 7.42-7.40 (3H, m), 7.38-7.36 (4H, m), 7.34 (1H, br s), 7.33-7.32 (1H, m), 7.29-7.26 (3H, m), 6.49 (1H, d, *J* = 10.0 Hz), 4.95 (1H, br d, *J* = 6.5 Hz), 3.52 (1H, quin, *J* = 8.5 Hz), 2.58-2.52 (1H, m), 2.44-2.37 (1H, m), 2.13-2.08 (1H, m), 1.76-1.73 (1H, m), 1.24-1.21 (1H, m), -0.17 (9H, s, 3 x CH<sub>3</sub>); <sup>13</sup>C NMR (CDCl<sub>3</sub>, 125 MHz, DEPT-135) δ 181.4 (C, C=O), 166.1 (CH), 162.2 (CH), 140.5 (C), 139.6 (C), 133.3 (C), 129.11 (2 x CH), 129.07 (CH), 128.8 (3 x CH), 128.75 (3 x CH), 128.71 (CH), 128.2 (2 x CH), 125.4 (CH), 121.3 (C), 115.4 (CH), 83.6 (C, TMSO-C), 74.4 (CH, N-CH), 51.0 (CH<sub>2</sub>), 26.7 (CH<sub>2</sub>), 22.5 (CH<sub>2</sub>), 1.6 (3 x CH<sub>3</sub>).

**Intermediate C<sub>3</sub>**: <sup>1</sup>H NMR (CDCl<sub>3</sub>, 500 MHz) δ 8.00 (1H, dd, *J* = 9.0, 3.0 Hz), 7.87 (1H, d, *J* =

3.0 Hz), 7.49 (2H, d,  $J = 2.0$  Hz), 7.47 (2H, d,  $J = 1.5$  Hz), 7.45-7.42 (3H, m), 7.31-7.30 (1H, m), 7.24 (1H, br s), 7.23 (1H, t,  $J = 1.5$  Hz), 7.22-7.20 (1H, m), 6.85 (1H, d,  $J = 9.0$  Hz, olefinic- $H$ ), 6.09 (1H, br s, O-CH-N), 5.67 (1H, dd,  $J = 10.0, 3.0$  Hz, olefinic- $H$ ), 4.59 (1H, dd,  $J = 9.0, 4.0$  Hz), 2.52-2.46 (1H, m), 2.37-2.30 (1H, m), 2.06-2.00 (1H, m), 1.72-1.65 (1H, m), 1.21-1.18 (1H, m), 0.91-0.82 (1H, m), -0.18 (9H, s, 3 x  $CH_3$ );  $^{13}C$  NMR ( $CDCl_3$ , 125 MHz, DEPT-135)  $\delta$  161.0 (C), 143.6 (C), 129.6 (2 x CH), 129.5 (2 x CH), 129.4 (2 x CH), 128.3 (CH), 127.8 (2 x C), 127.7 (2 x CH), 127.5 (CH), 127.0 (CH), 124.4 (CH), 124.0 (CH), 122.6 (CH), 120.0 (C), 112.3 (CH), 91.4 (CH, O-CH-N), 84.8 (C, TMSO-C), 67.1 (CH, N-CH), 45.9 ( $CH_2$ ), 29.4 ( $CH_2$ ), 25.0 ( $CH_2$ ), 1.8 (3 x  $CH_3$ ); HRMS  $m/z$  501.2209 (M + H), calcd for  $C_{29}H_{33}N_2O_4Si$  501.2210.

#### References:

1. (a) Z. Chen, J. Fan, A. S. Kende, *J. Org. Chem.* **2004**, *69*, 79. (b) I. P. Petrounia, J. Goldberg, E. J. Brush, *Biochemistry* **1994**, *33*, 2891. (c) T. Ishimaru, N. Shibata, J. Nagai, S. Nakamura, T. Toru, S. Kanemasa, *J. Am. Chem. Soc.* **2006**, *128*, 16488.
2. L. Zu, S. Zhang, H. Xie, W. Wang, *Org. Lett.* **2009**, *11*, 1627.

## Datablock: dbr34

---

Bond precision: C-C = 0.0056 Å Wavelength=1.54184  
Cell: a=9.2088(3) b=11.1545(3) c=13.3119(5)  
alpha=90 beta=106.479(3) gamma=90  
Temperature: 298 K

|                        | Calculated      | Reported        |
|------------------------|-----------------|-----------------|
| Volume                 | 1311.23(8)      | 1311.23(7)      |
| Space group            | P 21            | P21             |
| Hall group             | 2yb             | ?               |
| Moiety formula         | C29 H26 Br N O5 | ?               |
| Sum formula            | C29 H26 Br N O5 | C29 H26 Br N O5 |
| Mr                     | 548.41          | 548.42          |
| Dx, g cm <sup>-3</sup> | 1.389           | 1.389           |
| Z                      | 2               | 2               |
| Mu (mm <sup>-1</sup> ) | 2.458           | 2.458           |
| F000                   | 564.0           | 564.0           |
| F000'                  | 564.18          |                 |
| h, k, lmax             | 11, 13, 16      | 10, 13, 16      |
| Nref                   | 5134 [ 2708]    | 4989            |
| Tmin, Tmax             | 0.737, 0.782    | 0.271, 1.000    |
| Tmin'                  | 0.434           |                 |

Correction method= MULTI-SCAN  
Data completeness= 1.84/0.97 Theta(max)= 71.600  
R(reflections)= 0.0404( 4549) wR2(reflections)= 0.1134( 4989)  
S = 0.819 Npar= 328

---

## Data block dbr-34 - ellipsoid plot

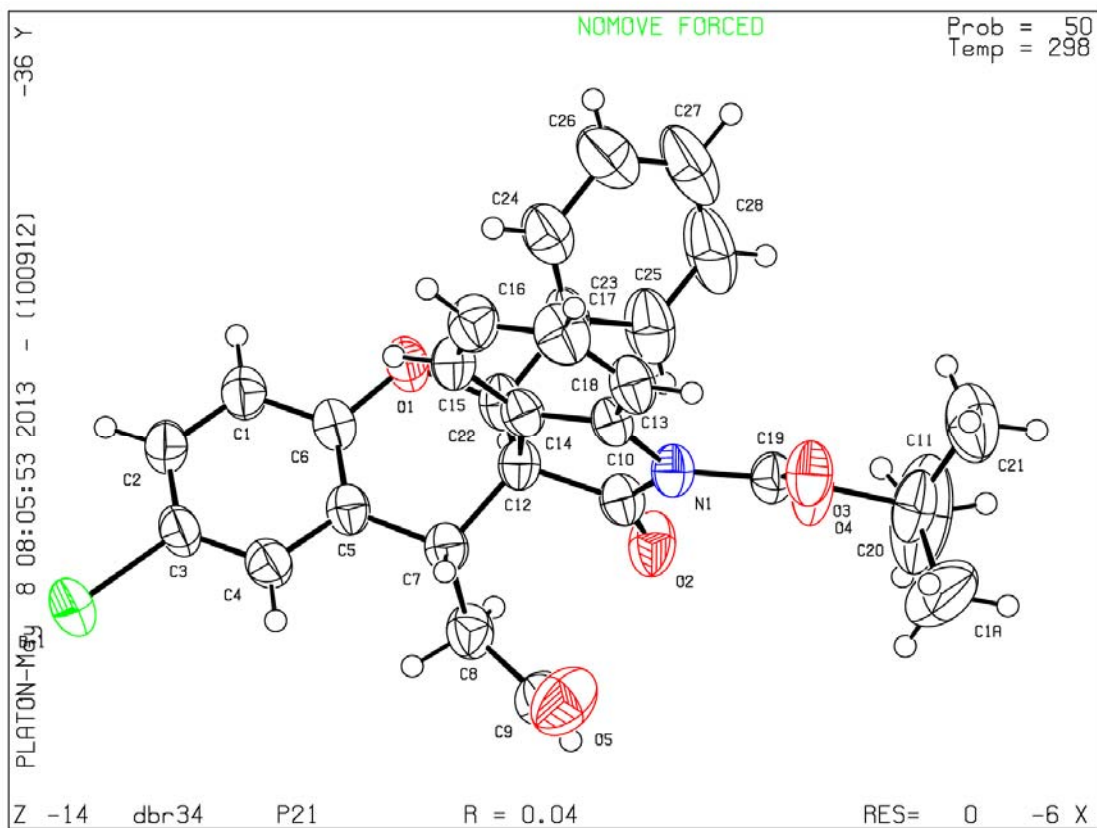

Supplement: c3ob42100g.pdf [file c3ob42100g.pdf]
